# Supplementary material for: Sensorimotor pathway controlling stopping behavior during chemotaxis in the Drosophila melanogaster larva
Source: eLife journal article supplement (doi:10.7554/elife.38740), 2018-11-22
Supplement: supp [file elife-38740-supp-v1.zip]

Archive with 18 entries (18 files):
- elife_poa_e38740_Figure_5_figure_supplement_1.tif
- elife_poa_e38740_Figure_1_figure_supplement_1.tif
- elife_poa_e38740_Figure_5_figure_supplement_2.tif
- elife_poa_e38740_Figure_2_figure_supplement_1.tif
- elife_poa_e38740_Transparent_Reporting_File.pdf
- elife_poa_e38740_Figure_1_figure_supplement_3.tif
- elife_poa_e38740_Movie_2.avi
- elife_poa_e38740_Figure_3_figure_supplement_1.tif
- elife_poa_e38740_Figure_3_figure_supplement_4.pdf
- elife_poa_e38740_Figure_1_figure_supplement_2.tif
- elife_poa_e38740_Figure_3_figure_supplement_2.tif
- elife_poa_e38740_Figure_4_figure_supplement_1.tif
- elife_poa_e38740_Supplementary_File_1.xlsx
- elife_poa_e38740_Figure_2_figure_supplement_2.tif
- elife_poa_e38740_Movie_1.avi
- elife_poa_e38740_Figure_3_figure_supplement_3.tif
- elife_poa_e38740_Movie_3.avi
- elife_poa_e38740_Figure_3_figure_supplement_5.tif
