# Supplementary material for: Sensorimotor pathway controlling stopping behavior during chemotaxis in the Drosophila melanogaster larva
Source: eLife journal article supplement (doi:10.7554/elife.38740), 2018-11-22

A

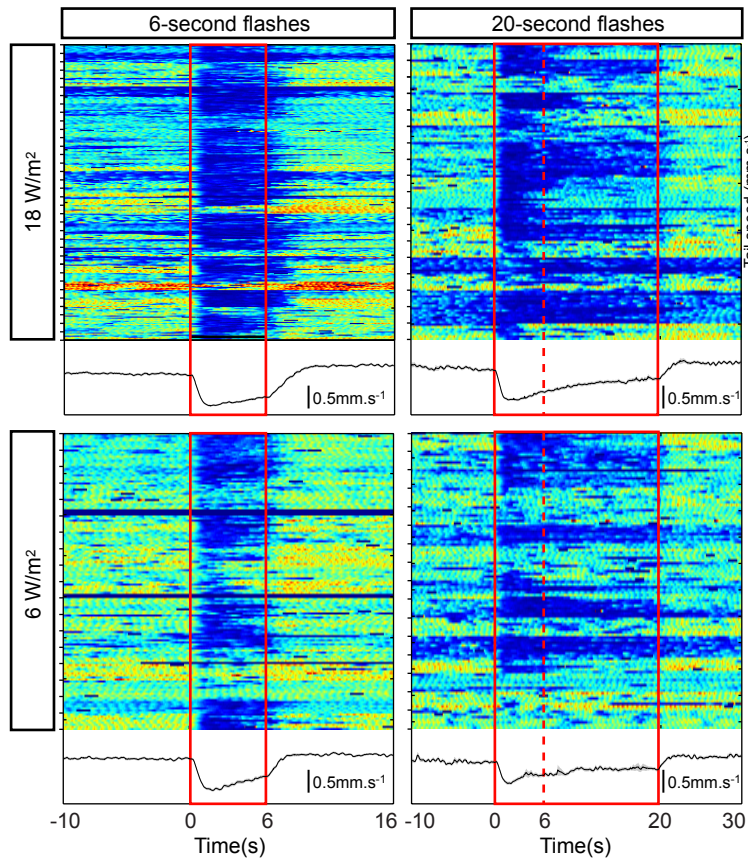

B

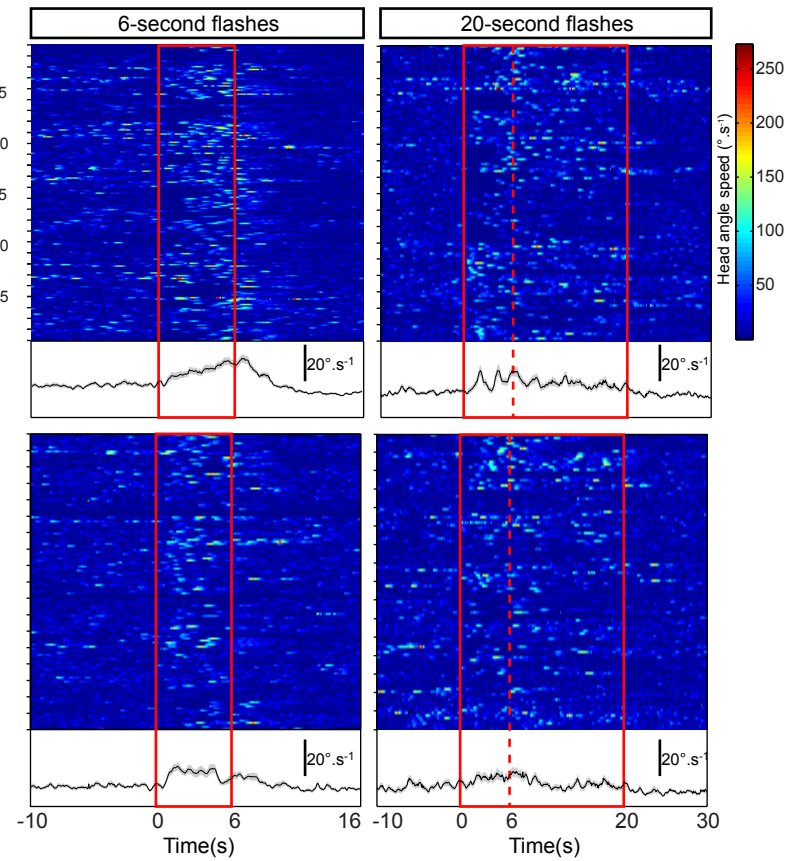

C

Correlation matrix for tail speed

Larva identity

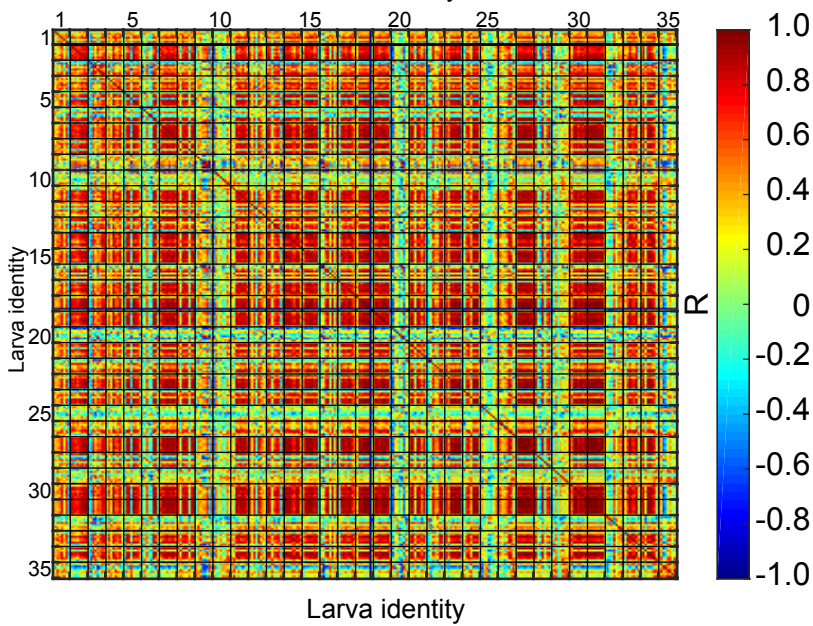

D

Correlation matrix for head angle speed

Larva identity

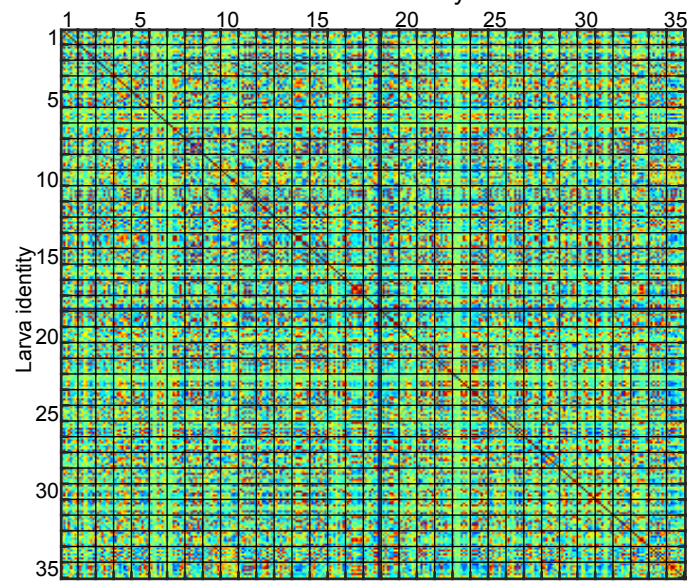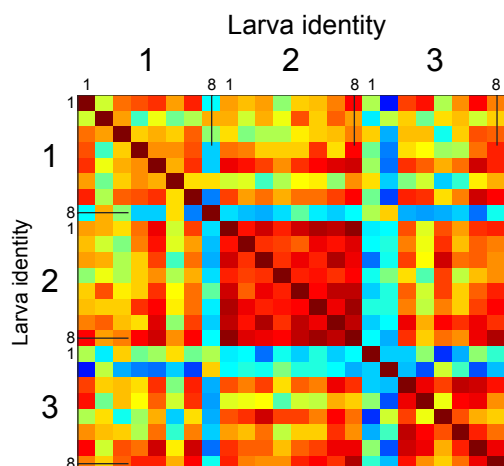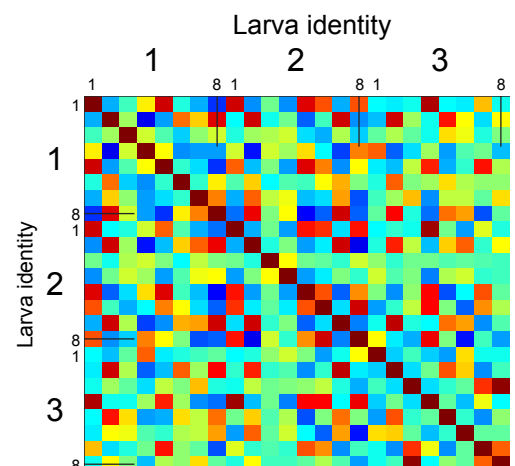

Supplement: supp [file elife-38740-supp-v1.zip › elife_poa_e38740_Figure_3_figure_supplement_4.pdf]
