# Supplementary material for: Sensorimotor pathway controlling stopping behavior during chemotaxis in the Drosophila melanogaster larva
Source: eLife journal article supplement (doi:10.7554/elife.38740), 2018-11-22
Supplement: supp [file elife-38740-supp-v1.zip › elife_poa_e38740_Supplementary_File_1.xlsx]

## Sheet: Figure 1
Statistical tests in Figure 1F
Name of test
Wilcoxon ranksum
Group-1	p-value			Group-2	p-value		Group-3	p-value
wt-background>TNT vs. wt-background>TNT no odor	2.9e-17			wt-background>TNT vs. PDM-DN>TNT	0.000103		wt-background>TNT no odor vs. PDM-DN> TNT	3.85e-14

## Sheet: Figure 1- Figure Supplement 3
Statistical tests in Figure 1- Figure Supplement 3A
Name of test
One-way ANOVA	p-value
	0.2802
Group-1	p-value			Group-2	p-value		Group-3	p-value
wt-background>TNT vs. wt-background>TNT no odor	0.1535			wt-background>TNT vs. PDM-DN>TNT	0.7574		wt-background>TNT no odor vs. PDM-DN> TNT	0.1955
Statistical tests in Figure 1- Figure Supplement 3B
Name of test
One-way ANOVA	p-value
	0.0002
Group-1	p-value			Group-2	p-value		Group-3	p-value
wt-background>TNT vs. wt-background>TNT no odor	0.6024			wt-background>TNT vs. PDM-DN>TNT	0.0004		wt-background>TNT no odor vs. PDM-DN> TNT	0.0006

## Sheet: Figure 3
Statistical tests in Figure 3D left panel
Name of test
Wilcoxon ranksum
Group-1	p-value			Group-2	p-value		Group-3	p-value
wt-background>TNT vs. PDM-DN>wt	0.06			wt-background>TNT vs. PDM-DN>TNT	0.0028		PDM-DN>wt vs. PDM-DN>TNT	7.79e-05
Statistical tests in Figure 3D right panel
Name of test
Wilcoxon ranksum
Group-1	p-value			Group-2	p-value		Group-3	p-value
wt-background>TNT vs. PDM-DN>wt	0.0163			wt-background>TNT vs. PDM-DN>TNT	0.3677		PDM-DN>wt vs. PDM-DN>TNT	0.0016
Statistical tests in Figure 3E
Name of test
Wilcoxon ranksum
Group-1	p-value
Average stopping duration for PDM-DN activation vs average stopping duration for the wildtype background	0.00093651
Statistical tests in Figure 3F
Name of test
Clopper Pearson
95% confidence intervals are computed by using Clopper Person method for binomial proportions and represented as error bars for each condition
Statistical tests in Figure 3I
Name of test
Wilcoxon ranksum
Group-1	p-value
wt-background>CsChrimson::mVenus vs. PDM-DN>CsChrimson::mVenus	2.93E10-7
Statistical tests in Figure 3K
Name of test
Clopper Pearson
95% confidence intervals are computed by using Clopper Person method for binomial proportions and represented as error bars for each condition
Statistical tests in Figure 3M
Name of test				Name of test
Wilcoxon ranksum				Wilcoxon ranksum
Group-1 Down-gradient	p-value			Group-2 Up-gradient	p-value
wt-background>CsChrimson::mVenus vs. PDM-DN>CsChrimson::mVenus	0.0119			wt-background>CsChrimson::mVenus vs. PDM-DN>CsChrimson::mVenus	0.1054

## Sheet: Figure 3- Figure Supplement 1
Statistical tests in Figure 3 - Figure Supplement 1A
Name of test
Wilcoxon ranksum
Group-1	p-value			Group-2	p-value		Group-3	p-value
wt-background>TNT vs. PDM-DN>wt	6.05e-08			wt-background>TNT vs. PDM-DN>TNT	0.9946		PDM-DN>wt vs. PDM-DN>TNT	1.87e-07
Statistical tests in Figure 3 - Figure Supplement 1B 0-60s
Name of test
Wilcoxon ranksum
Group-1	p-value			Group-2	p-value		Group-3	p-value
wt-background>TNT vs. PDM-DN>wt	3.08E10-7			wt-background>TNT vs. PDM-DN>TNT	0.9778		PDM-DN>wt vs. PDM-DN>TNT	3.12E10-6
Statistical tests in Figure 3 - Figure Supplement 1B 60-120s
Name of test
Wilcoxon ranksum
Group-1	p-value			Group-2	p-value		Group-3	p-value
wt-background>TNT vs. PDM-DN>wt	2.47E10-4			wt-background>TNT vs. PDM-DN>TNT	0.82		PDM-DN>wt vs. PDM-DN>TNT	5.91E10-4
Statistical tests in Figure 3 - Figure Supplement 1B 120-180s
Name of test
Wilcoxon ranksum
Group-1	p-value			Group-2	p-value		Group-3	p-value
wt-background>TNT vs. PDM-DN>wt	7.94E10-4			wt-background>TNT vs. PDM-DN>TNT	0.0054		PDM-DN>wt vs. PDM-DN>TNT	1.18E10-6
Statistical tests in Figure 3 - Figure Supplement 1B 180-240s
Name of test
Wilcoxon ranksum
Group-1	p-value			Group-2	p-value		Group-3	p-value
wt-background>TNT vs. PDM-DN>wt	3.08E10-7			wt-background>TNT vs. PDM-DN>TNT	0.9778		PDM-DN>wt vs. PDM-DN>TNT	3.12E10-6
Statistical tests in Figure 3 - Figure Supplement 1C
Name of test
Wilcoxon ranksum
Group-1 Down-gradient	p-value			Group-2 Up-gradient	p-value
wt-background>TNT vs. PDM-DN>TNT	8.43E10-4			wt-background>TNT vs. PDM-DN>TNT	0.9424
Statistical tests in Figure 3 - Figure Supplement 1F left panel
Name of test
Wilcoxon ranksum
Group-1	p-value
wt-background>TNT vs. PDM-DN>TNT	0.0055
Statistical tests in Figure 3 - Figure Supplement 1F right panel
Name of test
Wilcoxon ranksum
Group-1	p-value
wt-background>TNT vs. PDM-DN>TNT	0.1472
Statistical tests in Figure 3 - Figure Supplement 1H
Name of test
Wilcoxon ranksum
Group-1	p-value
wt-background>TNT vs. PDM-DN>TNT	0.2617
Statistical tests in Figure 3 - Figure Supplement 1I
Name of test
Wilcoxon ranksum
Group-1	p-value
wt-background>TNT vs. PDM-DN>TNT	0.1857

## Sheet: Figure 3 - Figure Supplement 2
Statistical tests in Figure 3 - Figure Supplement 2D
Name of test
Clopper Pearson
95% confidence intervals are computed by using Clopper Person method for binomial proportions and represented as error bars for each condition

## Sheet: Figure 3 - Figure Supplement 3
Statistical tests in Figure 3 - Figure Supplement 3D right panel
Name of test
Clopper Pearson
95% confidence intervals are computed by using Clopper Person method for binomial proportions and represented as error bars for each condition
Statistical tests in Figure 3 - Figure Supplement 3D left panel
Name of test
Wilcoxon ranksum
Group-1	p-value
Average stopping duration for PDM-DN activation vs average stopping duration for the wildtype background	0.00036
Statistical tests in Figure 3 - Figure Supplement 3G
Name of test
Wilcoxon signed-rank
Group-1	p-value			Group-2	p-value			Group-3	p-value			Group-4	p-value
Time point 1-Downgradient-PDM activation vs Upgradient PDM activation	0.7708			Time point 2-Downgradient-PDM activation vs Upgradient PDM activation	0.2543			Time point 3-Downgradient-PDM activation vs Upgradient PDM activation	0.0267			Time point 4-Downgradient-PDM activation vs Upgradient PDM activation	0.0087
Time point 1-Downgradient-wt control vs Upgradient wt control	0.9851			Time point 2-Downgradient-wt control vs Upgradient wt control	0.8225			Time point 3-Downgradient-wt control vs Upgradient wt control	0.6136			Time point 4-Downgradient-wt control vs Upgradient wt control	0.9851

## Sheet: Figure 4
Statistical tests in Figure 4B right panel
Name of test
Wilcoxon ranksum
Group-1	p-value			Group-2	p-value		Group-3	p-value
initial phase vs. hinge phase	0.5036			initial phase vs. late phase	0.3459		hinge phase vs. late phase	0.6153
Statistical tests in Figure 4C right panel
Name of test
Wilcoxon ranksum
Group-1	p-value			Group-2	p-value		Group-3	p-value
initial phase vs. hinge phase	0.1797			initial phase vs. late phase	0.1231		hinge phase vs. late phase	0.5982
Statistical tests in Figure 4F
Name of test
z-test for proportions
Group-1 Only next wave inhibited	z-score	p-value		Group-2 current wave terminated posterior to A4 + next wave inhibited	z-score	p-value		Group-3 current wave terminated immediately + next wave inhibited	z-score	p-value		Group-4 wave Failure to terminate/inhibit waves	z-score	p-value
Anterior vs. posterior	2.80001	0.00512		Anterior vs. posterior	-3.6196	0.0003		Anterior vs. posterior	-1.2621	0.2076		Anterior vs. posterior	0.4411	0.6672
Statistical tests in Figure 4H
Name of test
Wilcoxon signed-rank
Group-1 PDM-DN activation	p-value			Group-2 wt control	p-value
Before vs. During	4.73E10-4			Before vs. During	0.3594

## Sheet: Figure 5
Statistical tests in Figure 5D right panel
Name of test
Clopper Pearson
95% confidence intervals are computed by using Clopper Person method for binomial proportions and represented as error bars for each condition
Statistical tests in Figure 5E right panel
Name of test
Wilcoxon ranksum
Group-1	p-value
wt-background>TNT vs. SEZ-DN1>TNT	1.17E10-18

## Sheet: Figure 6
Statistical tests in Figure 4H
Name of test
Wilcoxon signed-rank
Group-1 SEZ-DN1 activation	p-value			Group-2 wt control	p-value
Before vs. During	0.0039			Before vs. During	0.3018
Statistical tests in Figure 4H
Name of test
Wilcoxon ranksum
Group-1	p-value
PDM-DN activation vs. No PDM-DN activation	5.66e-11
