# Supplementary figures and images for: Sensorimotor pathway controlling stopping behavior during chemotaxis in the Drosophila melanogaster larva
Source: eLife journal article supplement (doi:10.7554/elife.38740), 2018-11-22

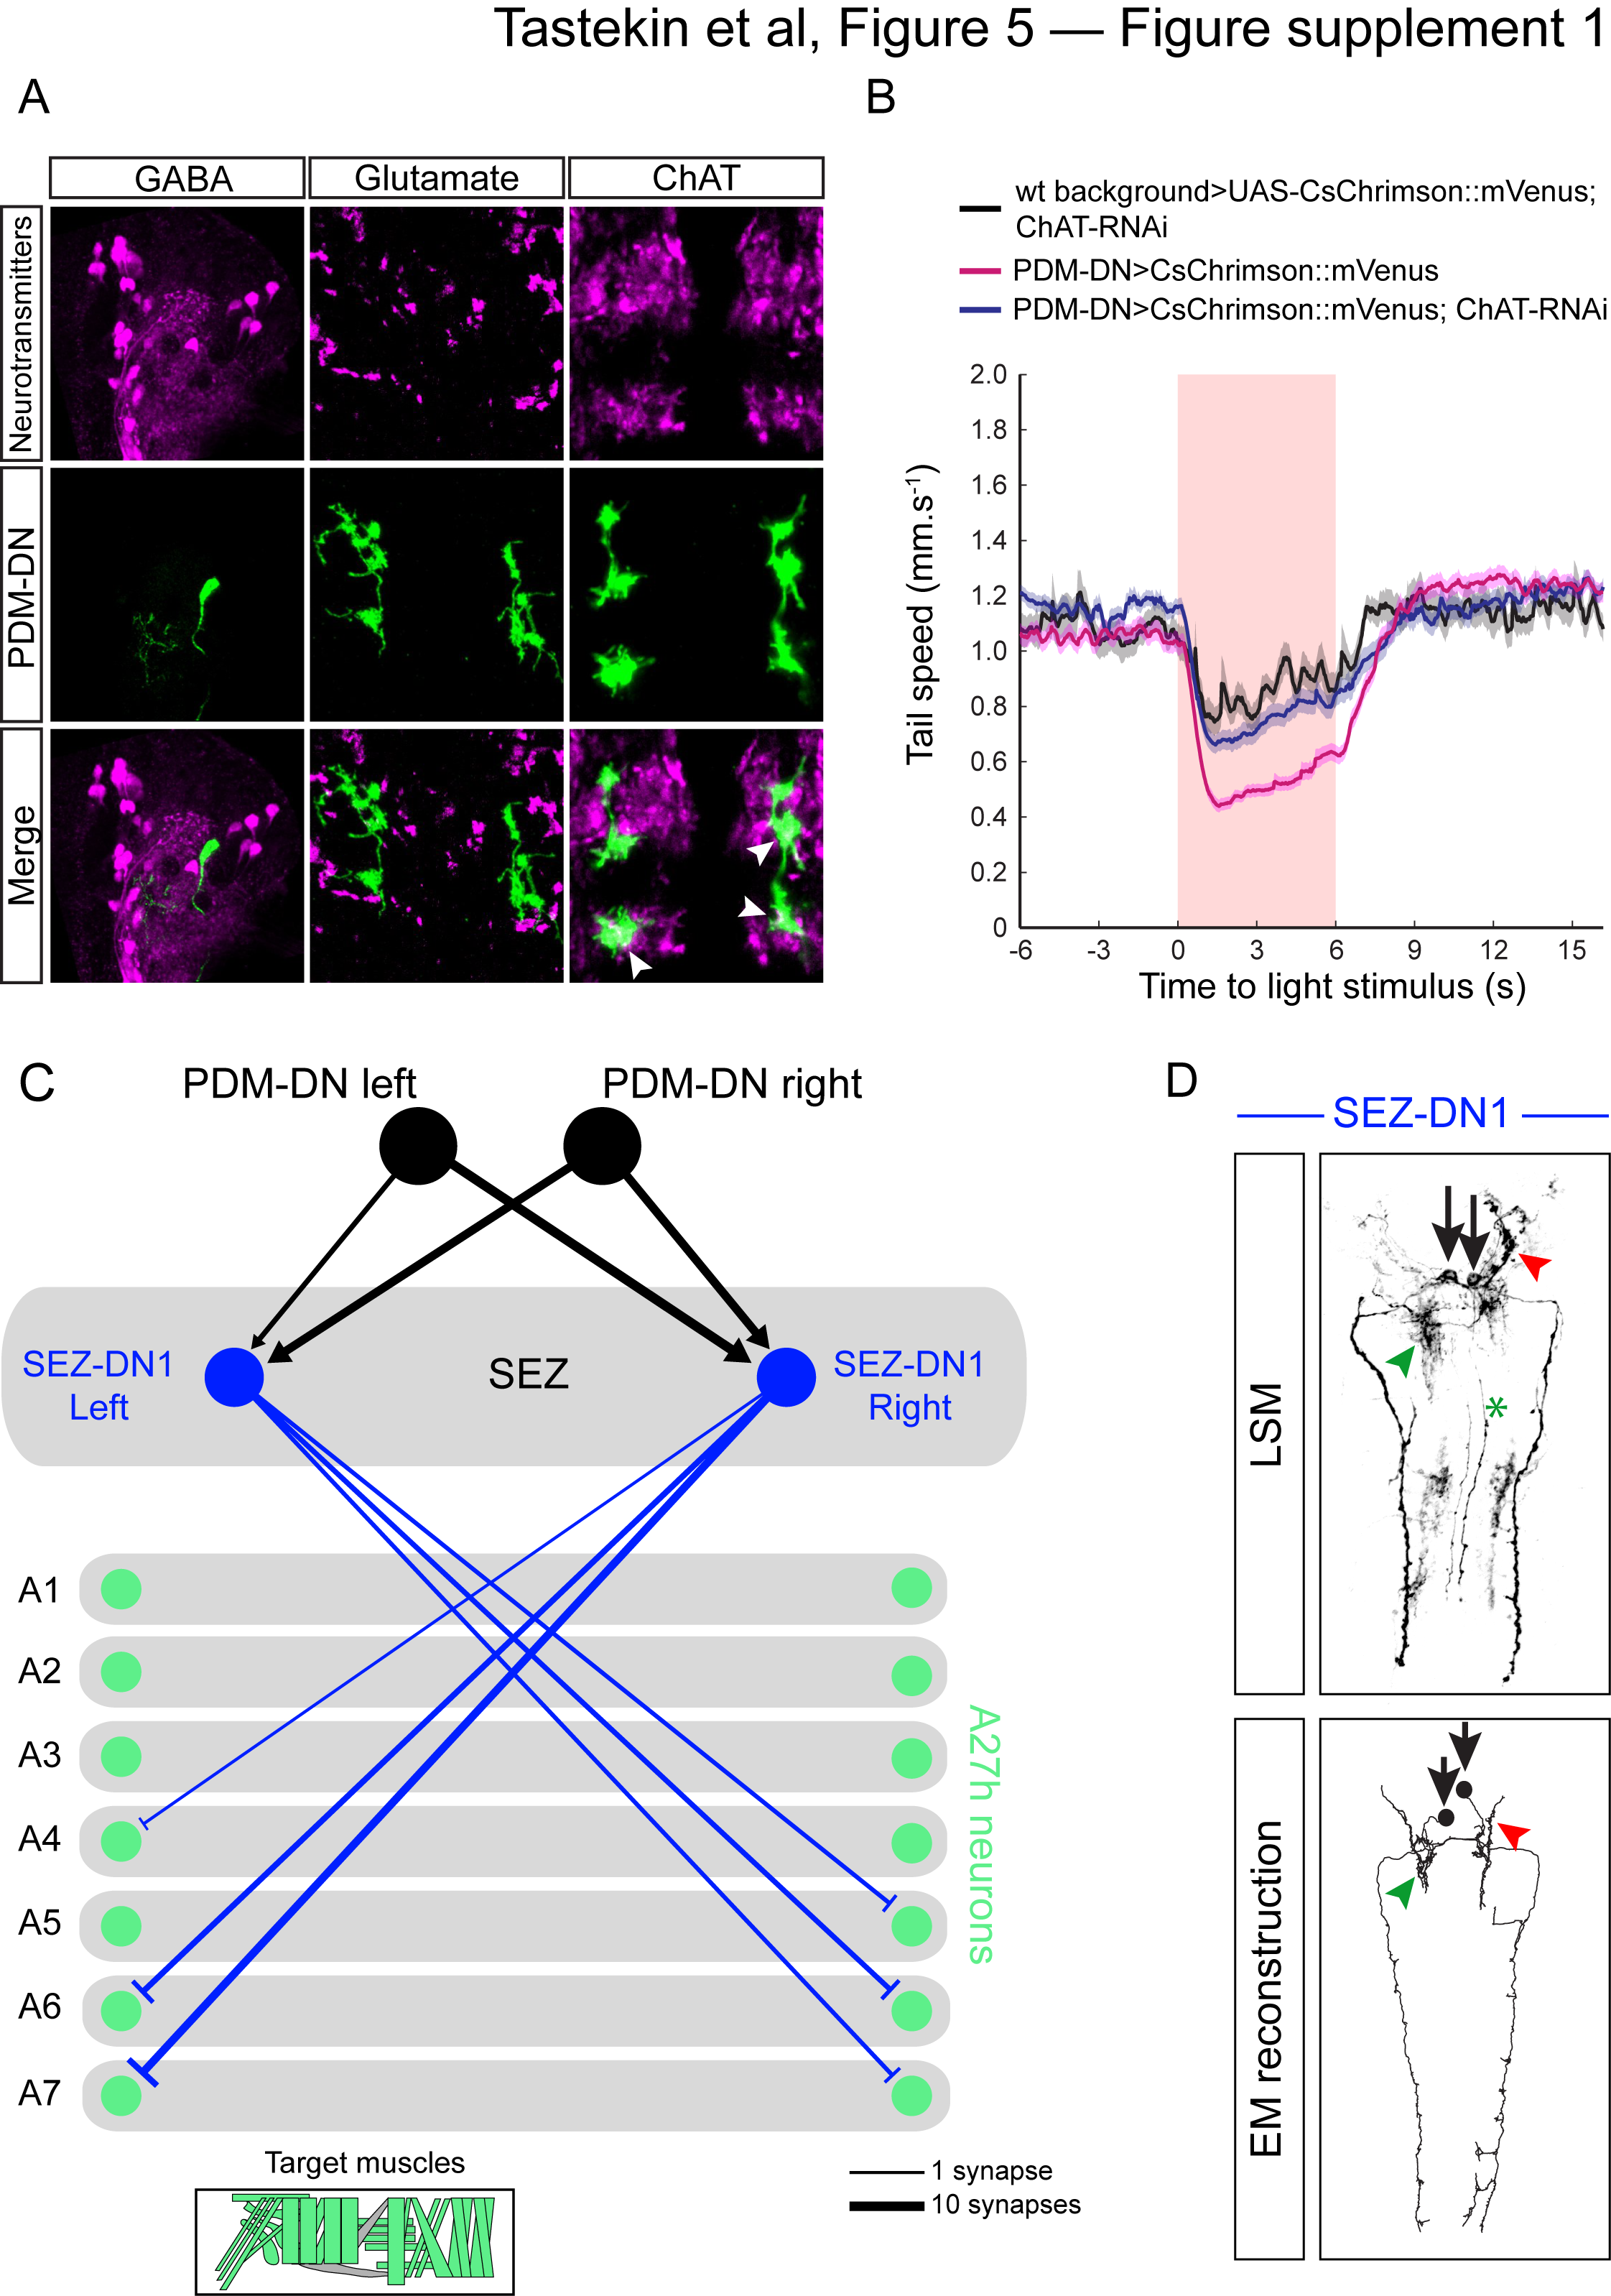

Supplement: supp [file elife-38740-supp-v1.zip › elife_poa_e38740_Figure_5_figure_supplement_1.tif]

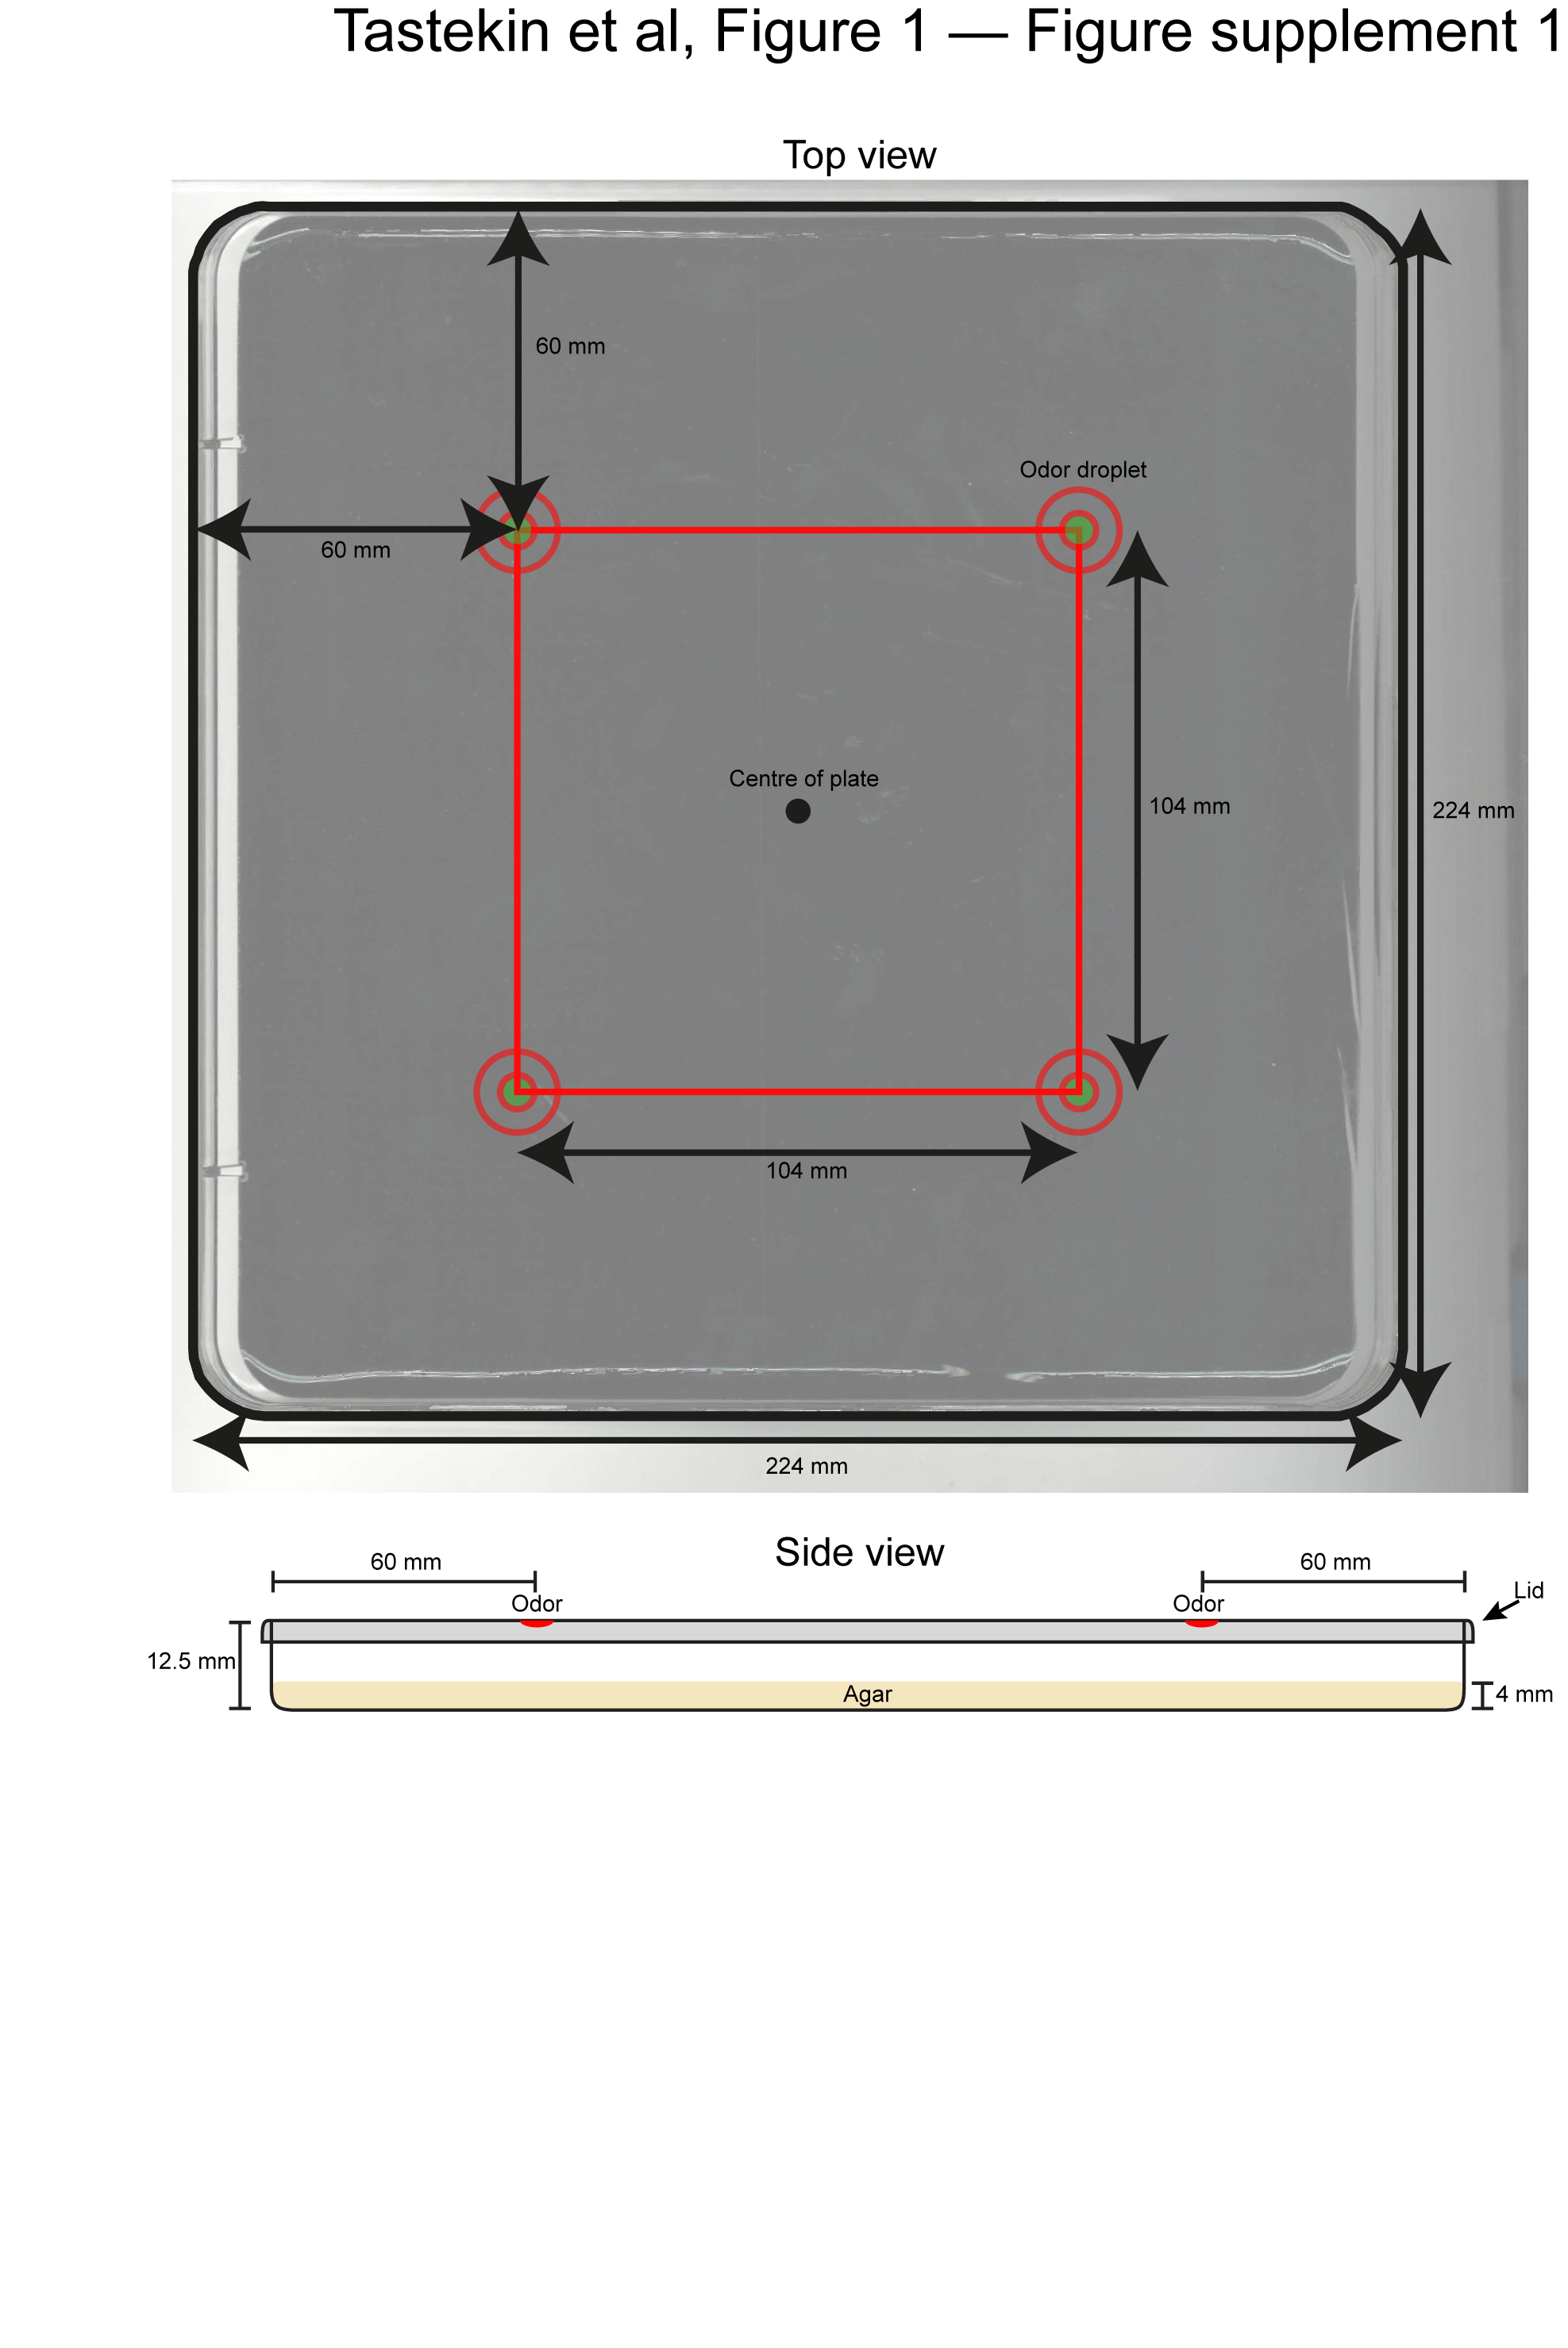

Supplement: supp [file elife-38740-supp-v1.zip › elife_poa_e38740_Figure_1_figure_supplement_1.tif]

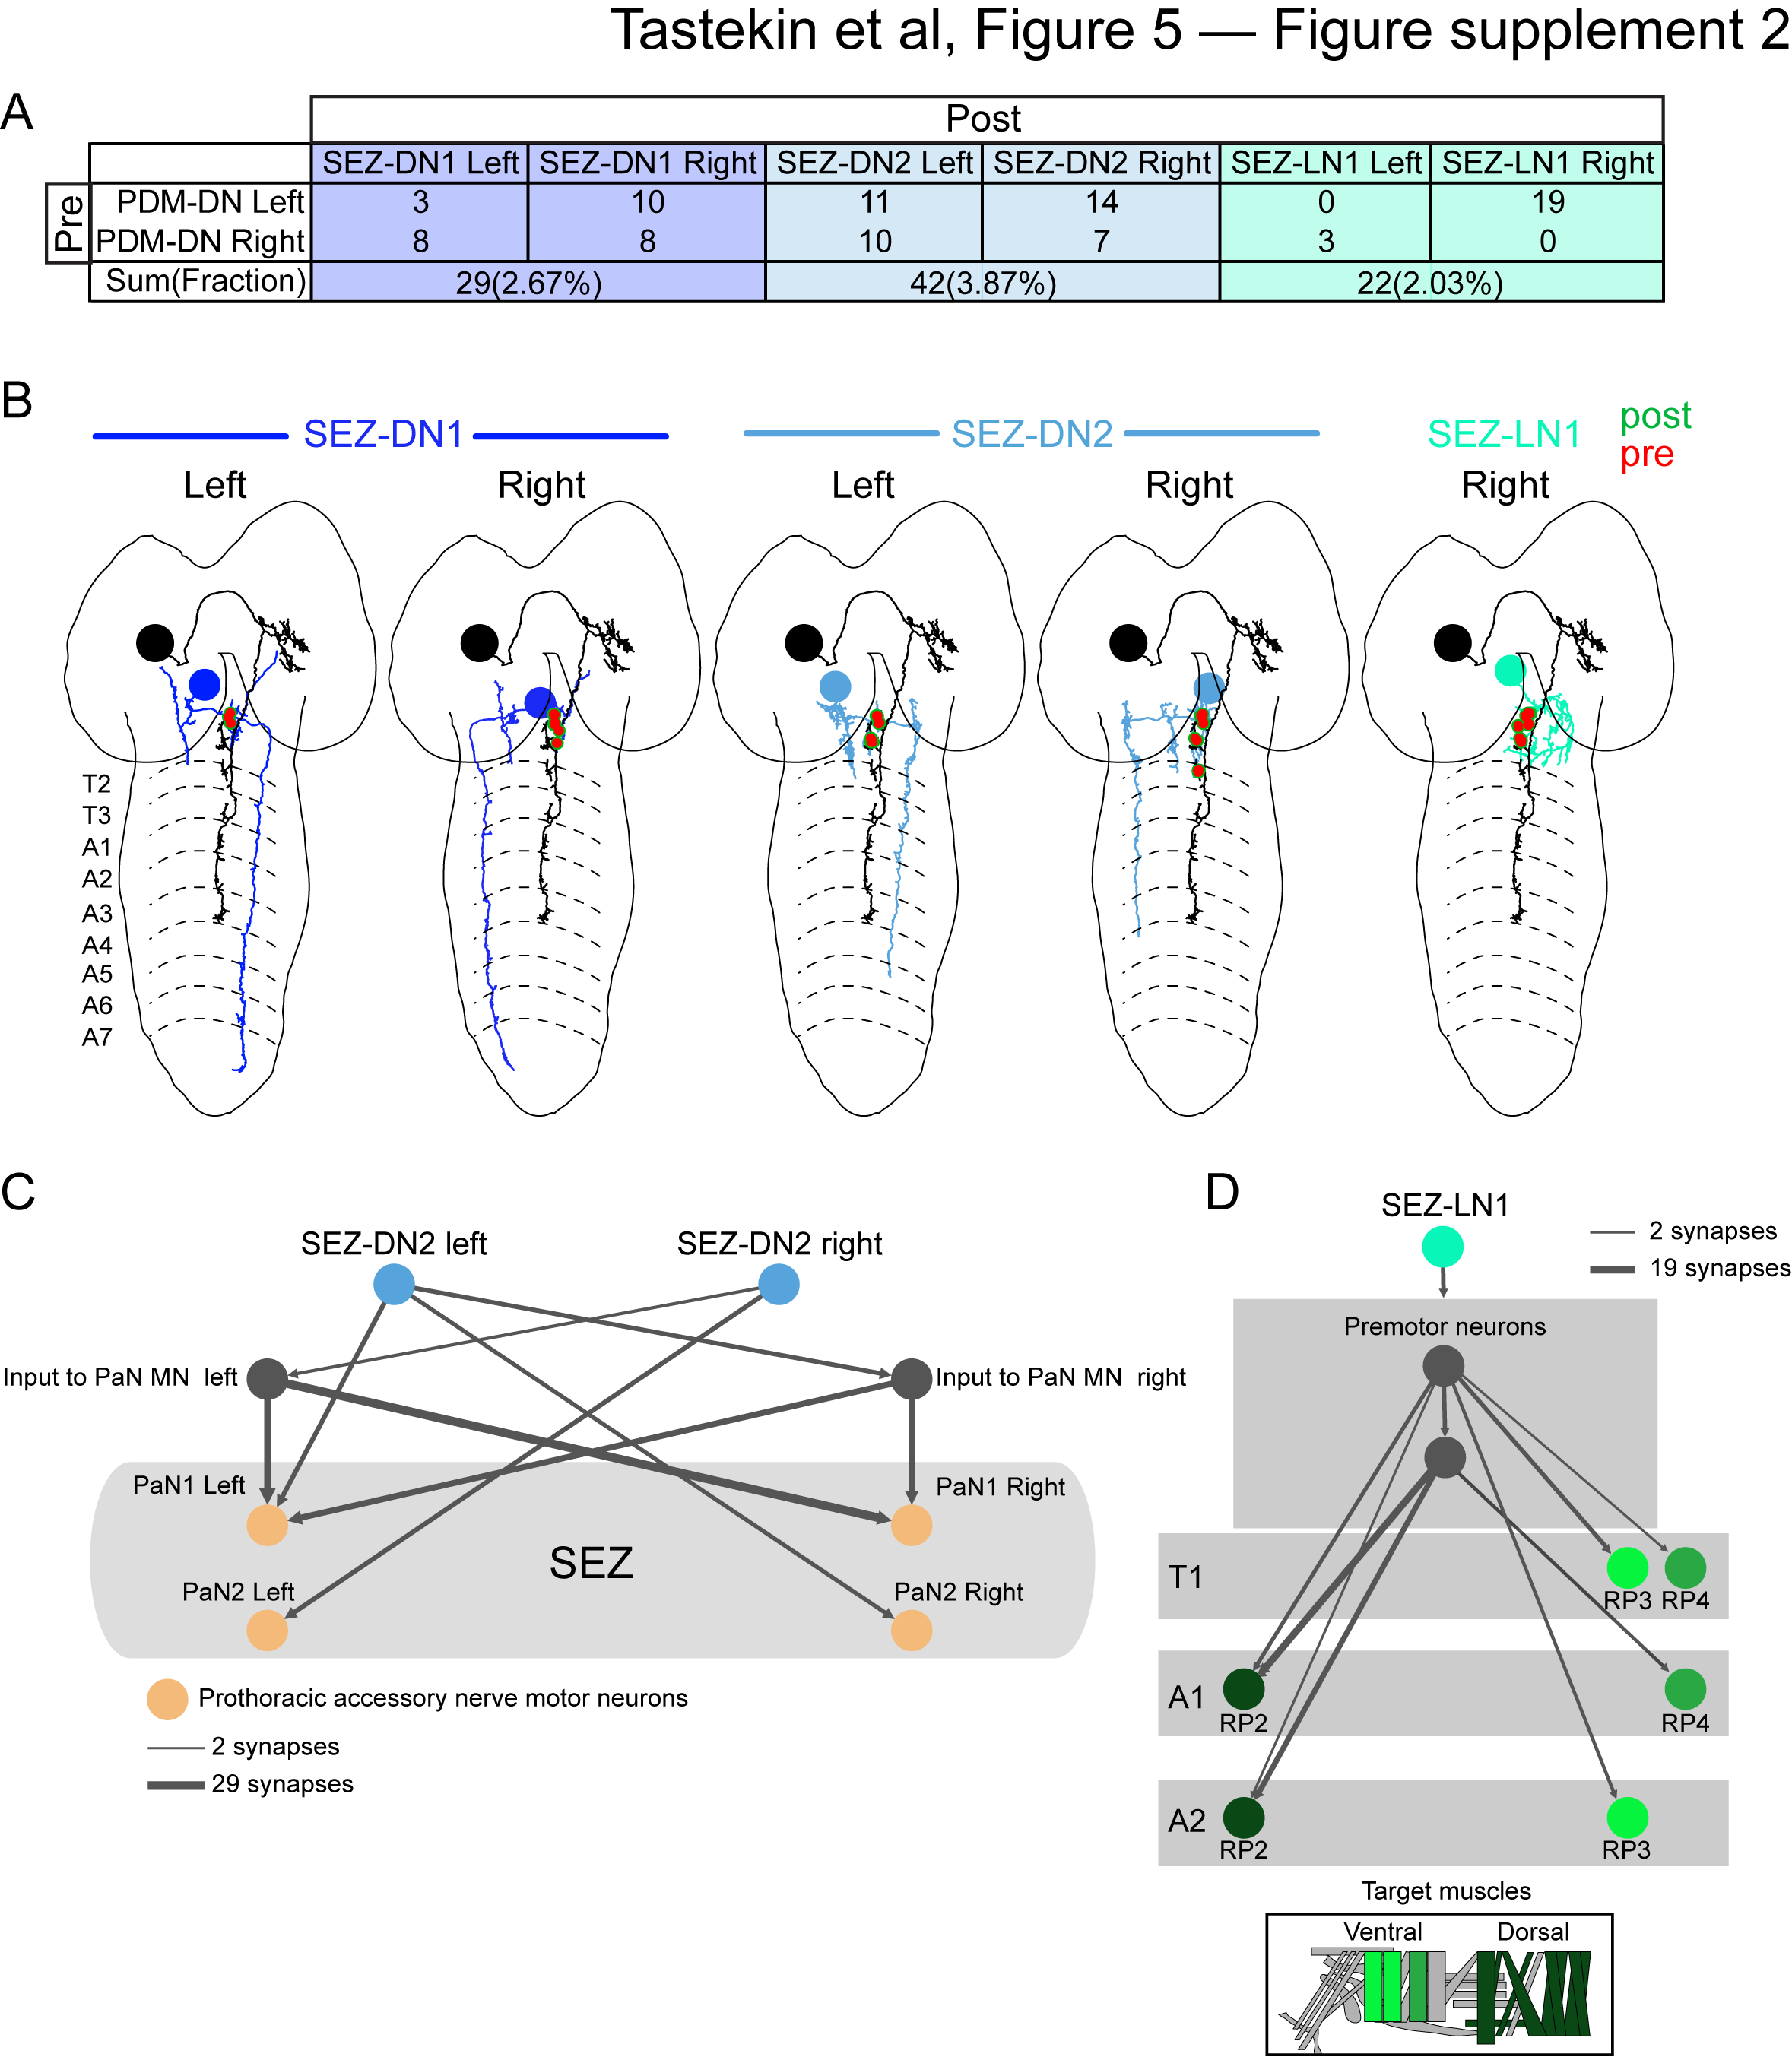

Supplement: supp [file elife-38740-supp-v1.zip › elife_poa_e38740_Figure_5_figure_supplement_2.tif]

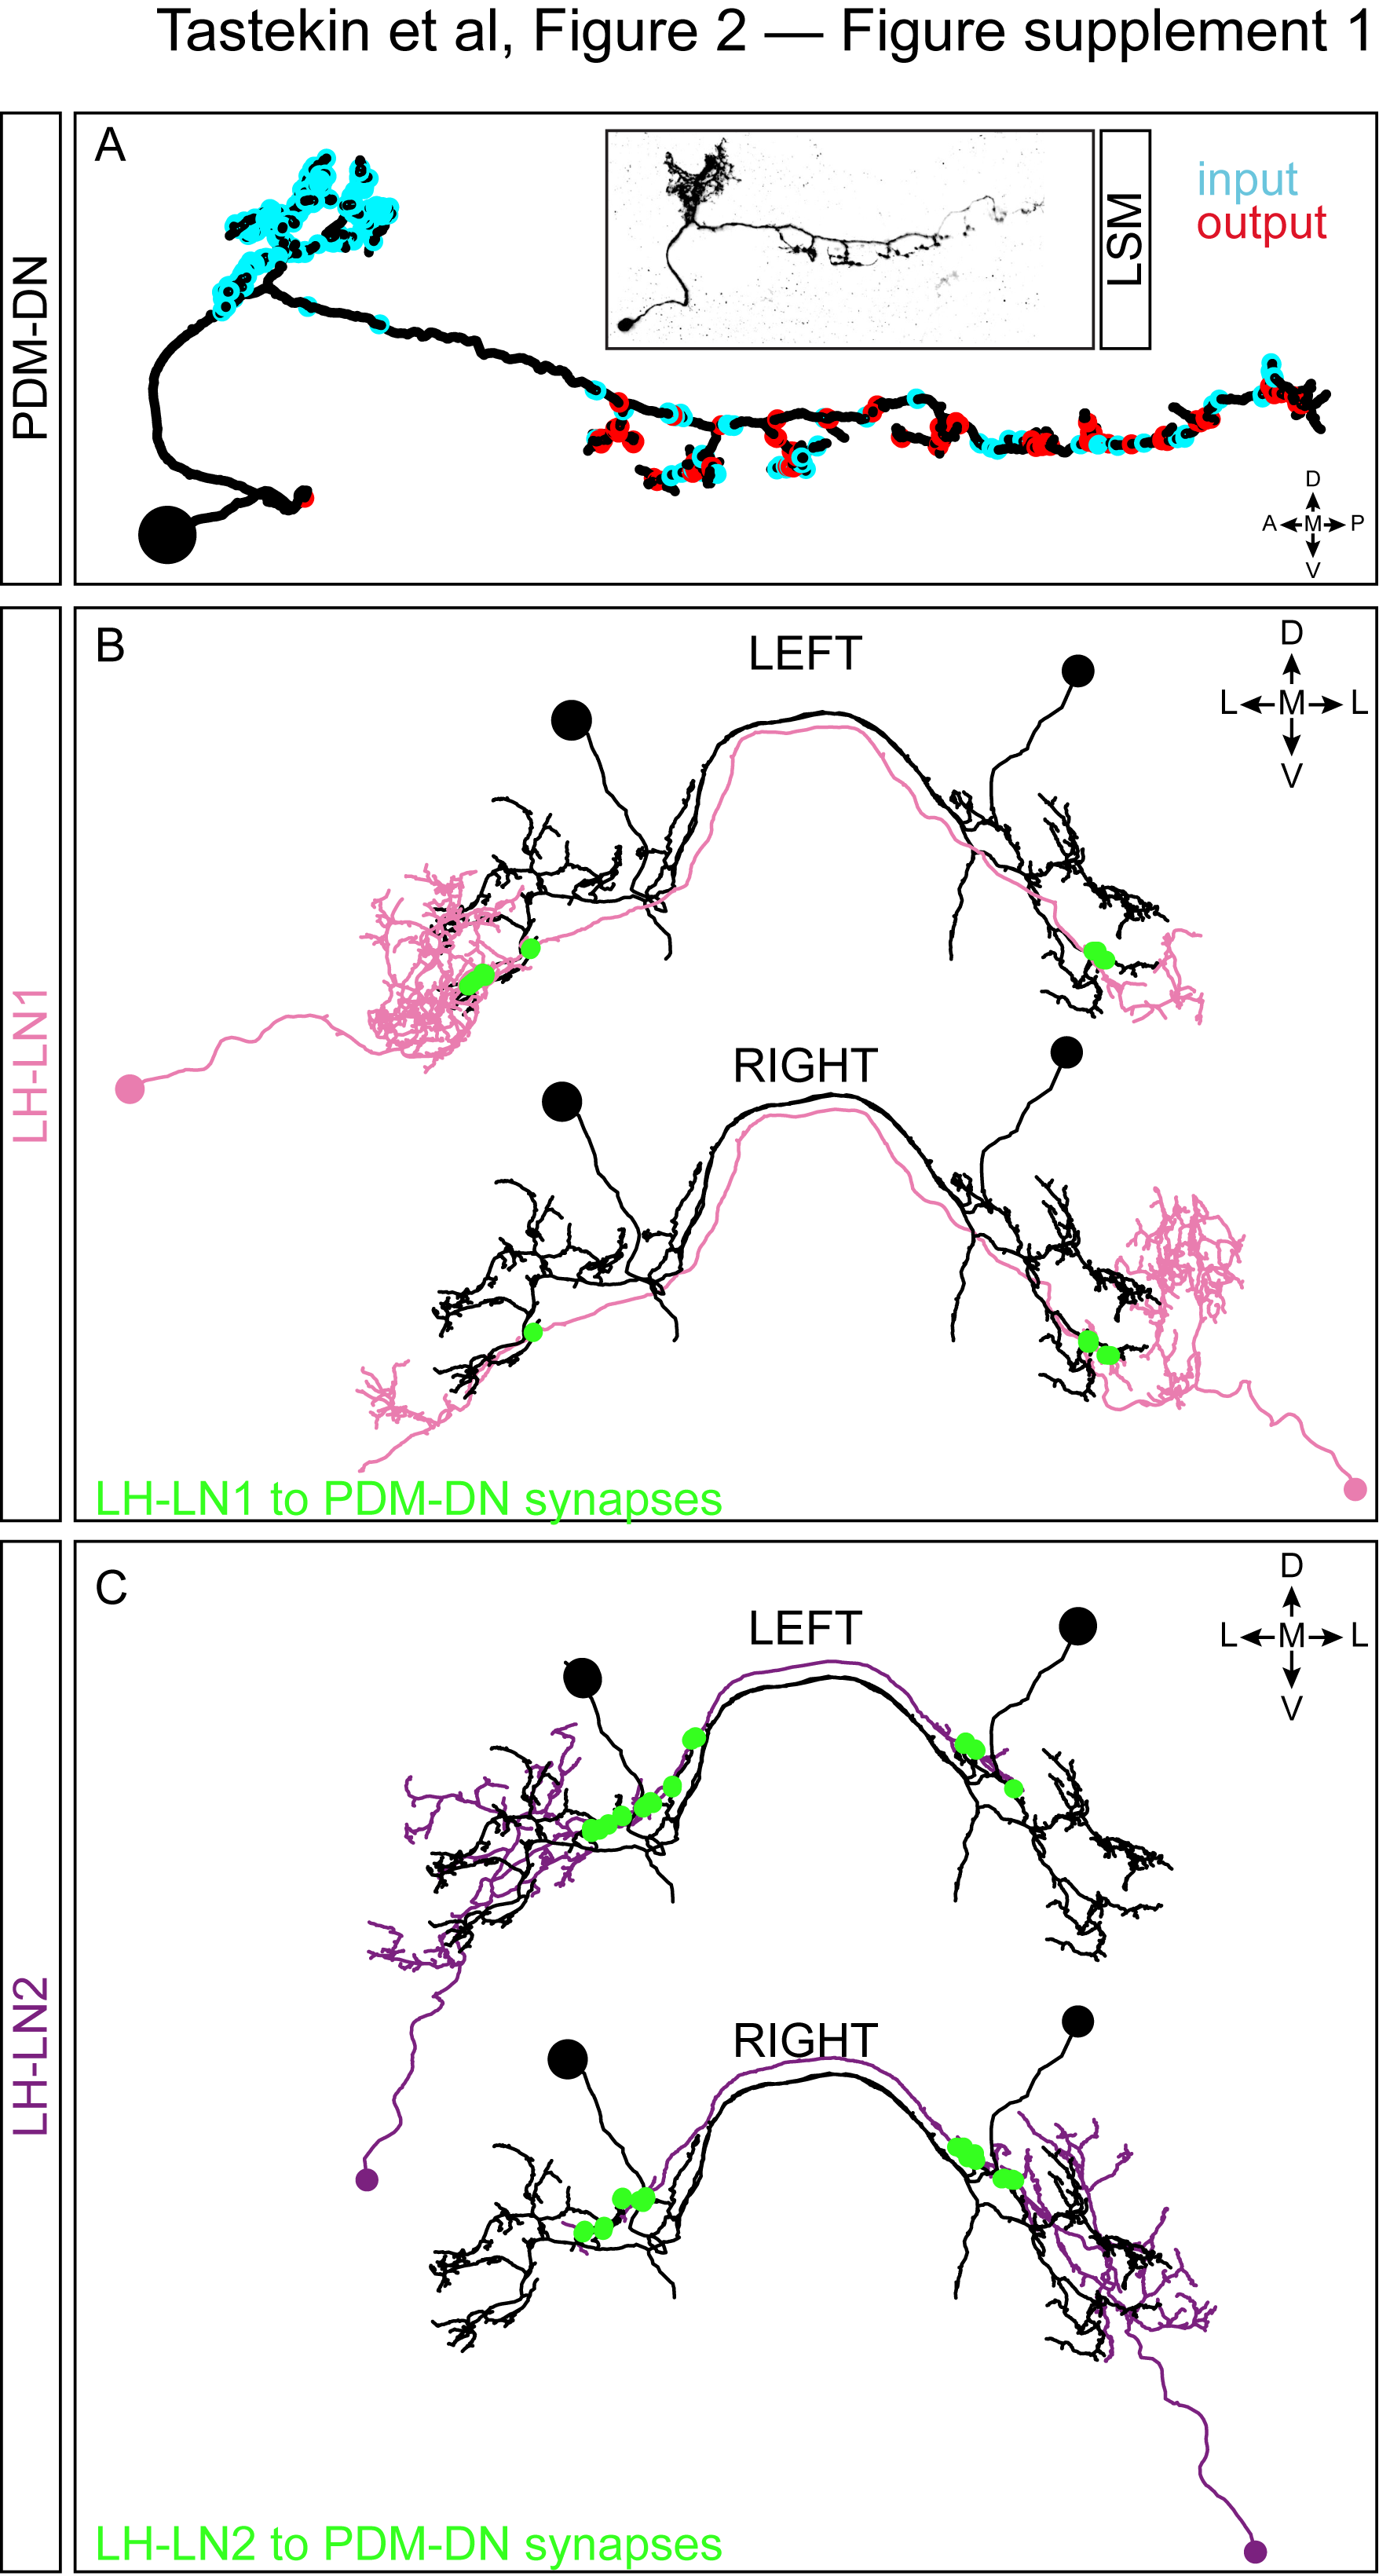

Supplement: supp [file elife-38740-supp-v1.zip › elife_poa_e38740_Figure_2_figure_supplement_1.tif]

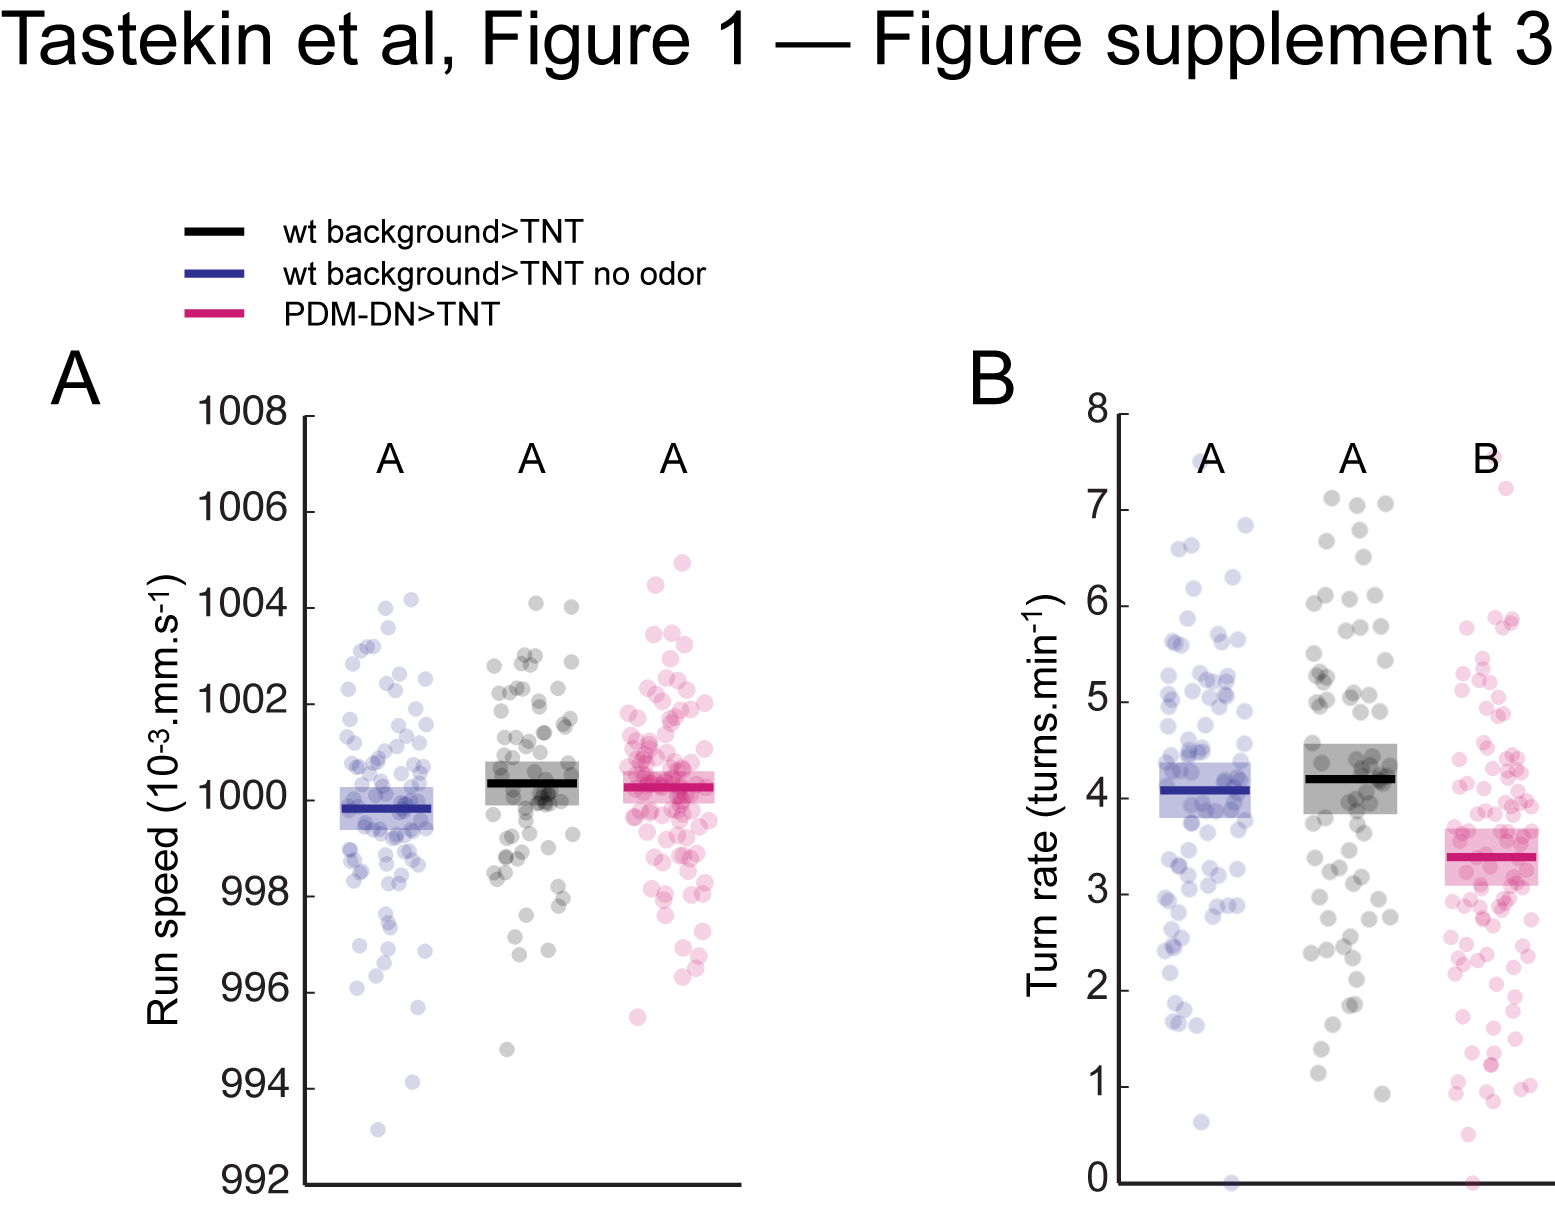

Supplement: supp [file elife-38740-supp-v1.zip › elife_poa_e38740_Figure_1_figure_supplement_3.tif]

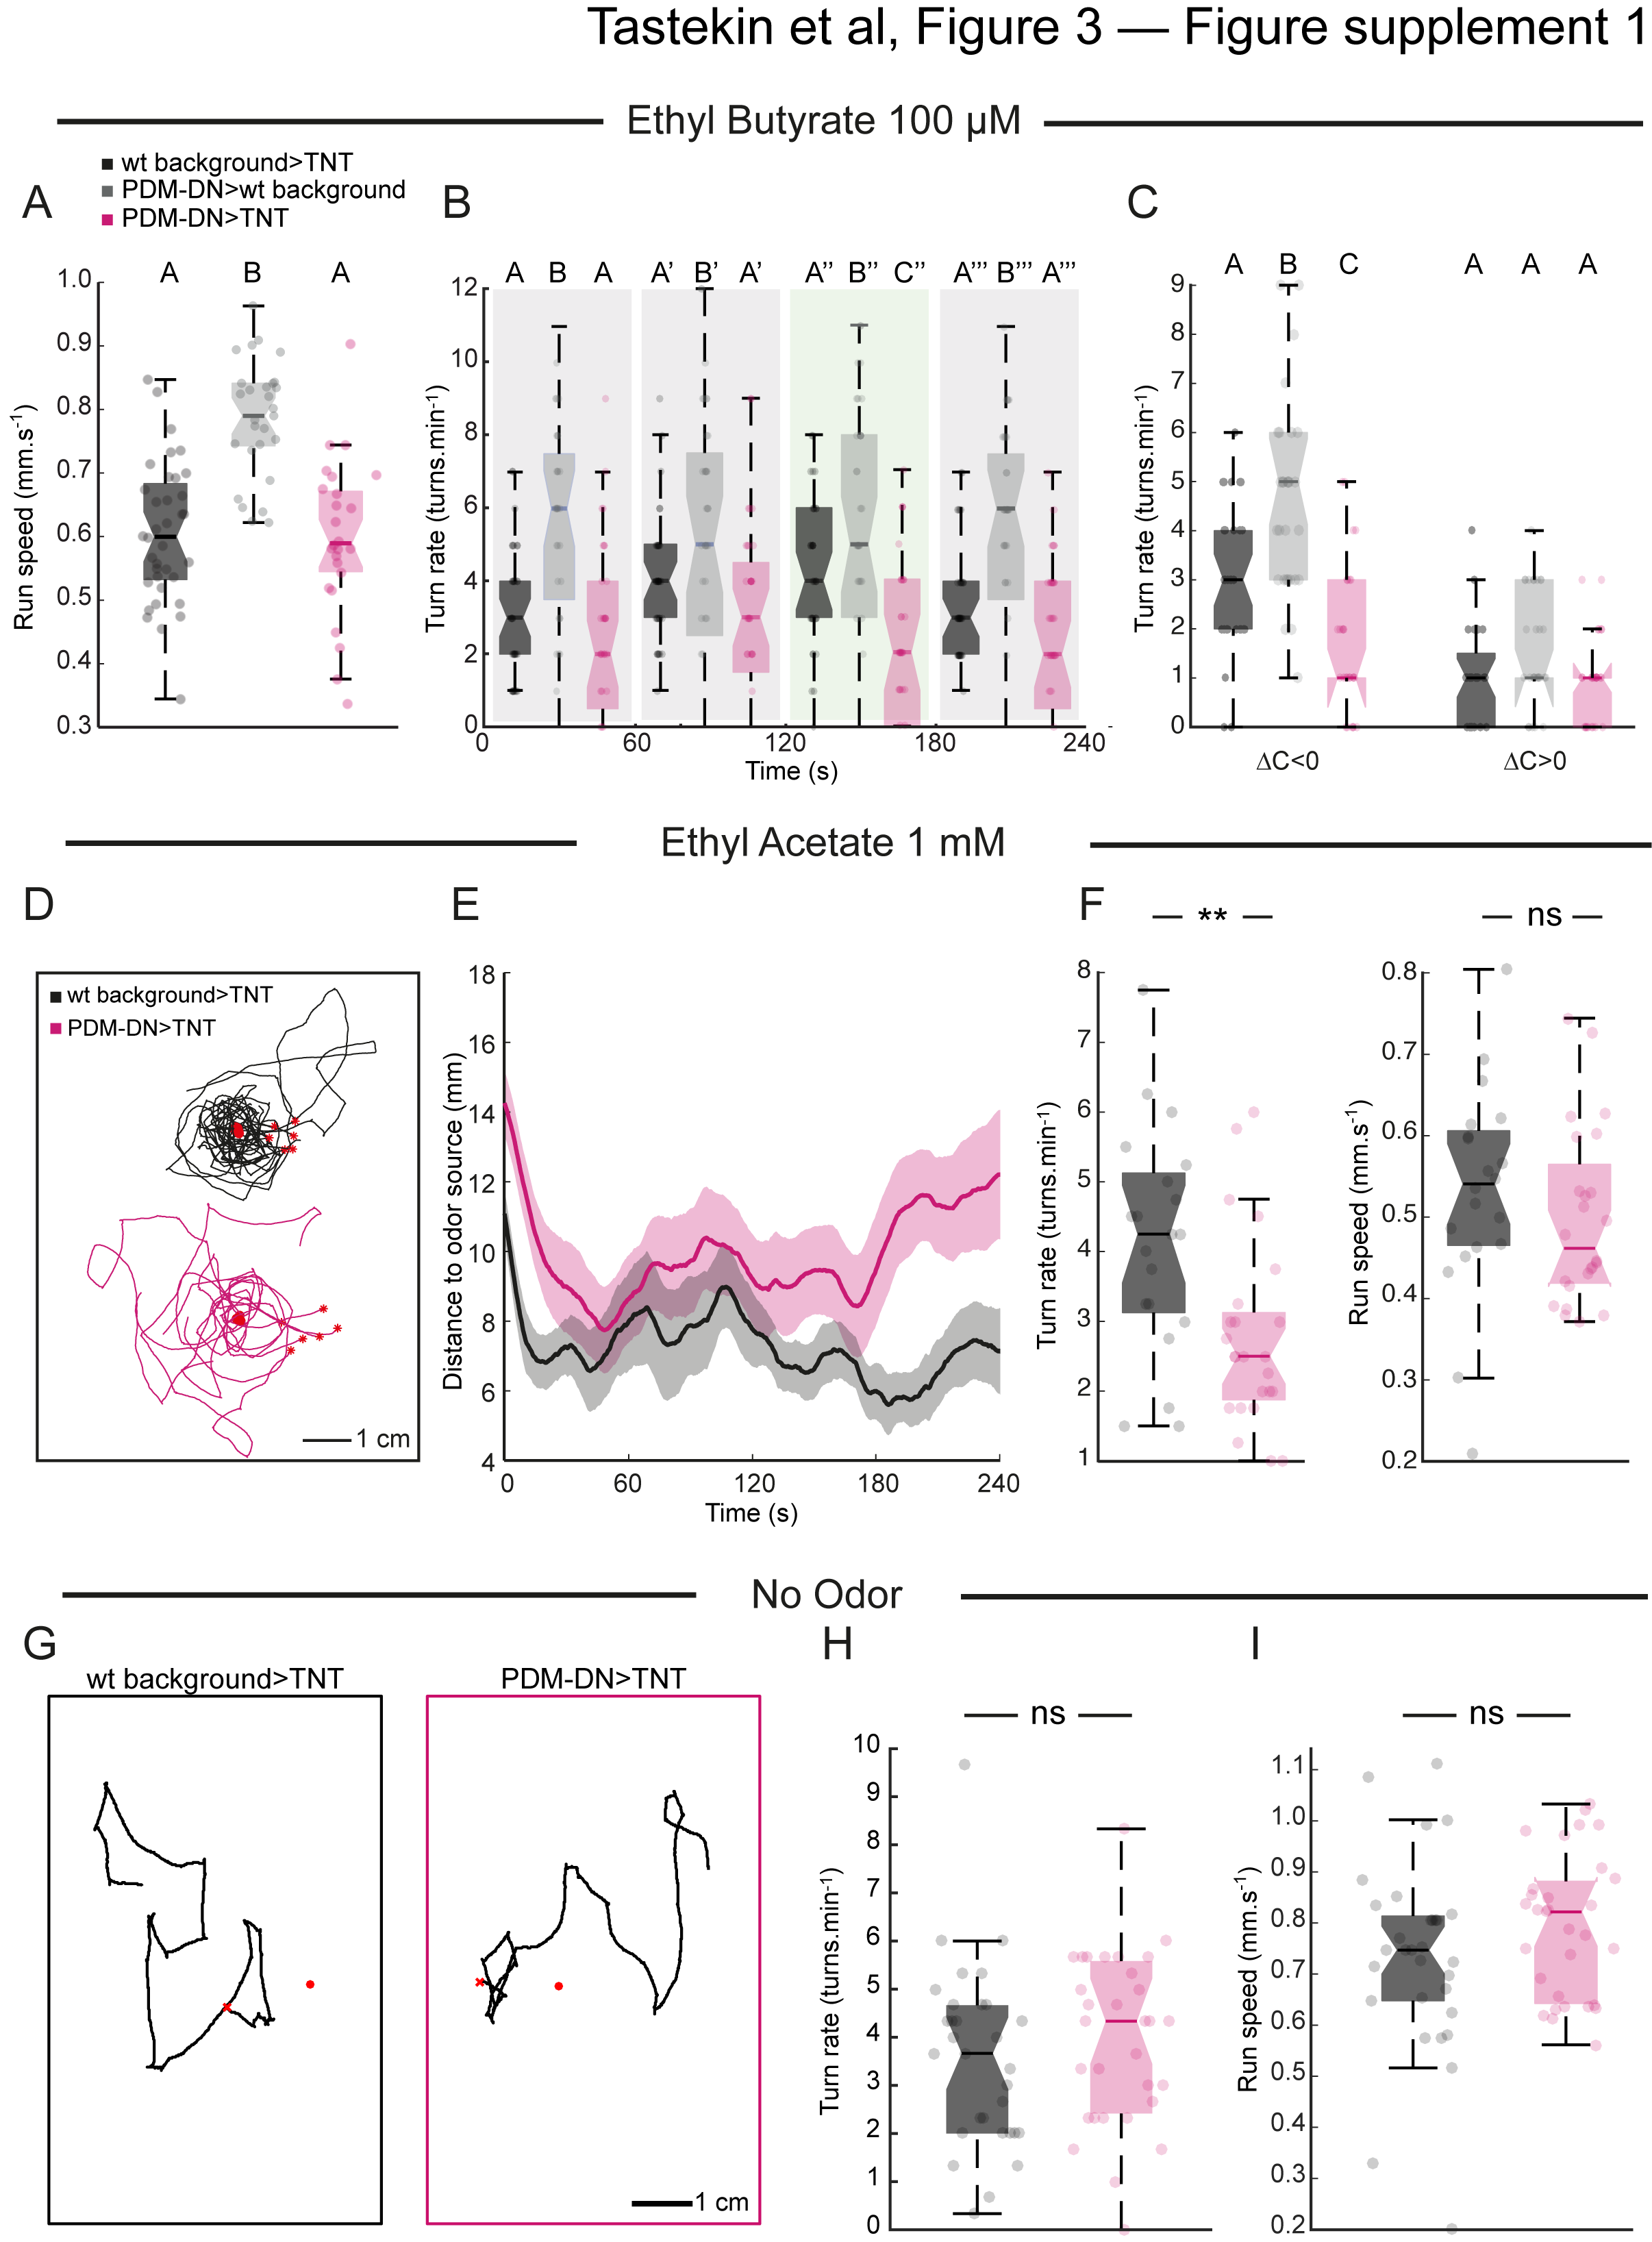

Supplement: supp [file elife-38740-supp-v1.zip › elife_poa_e38740_Figure_3_figure_supplement_1.tif]

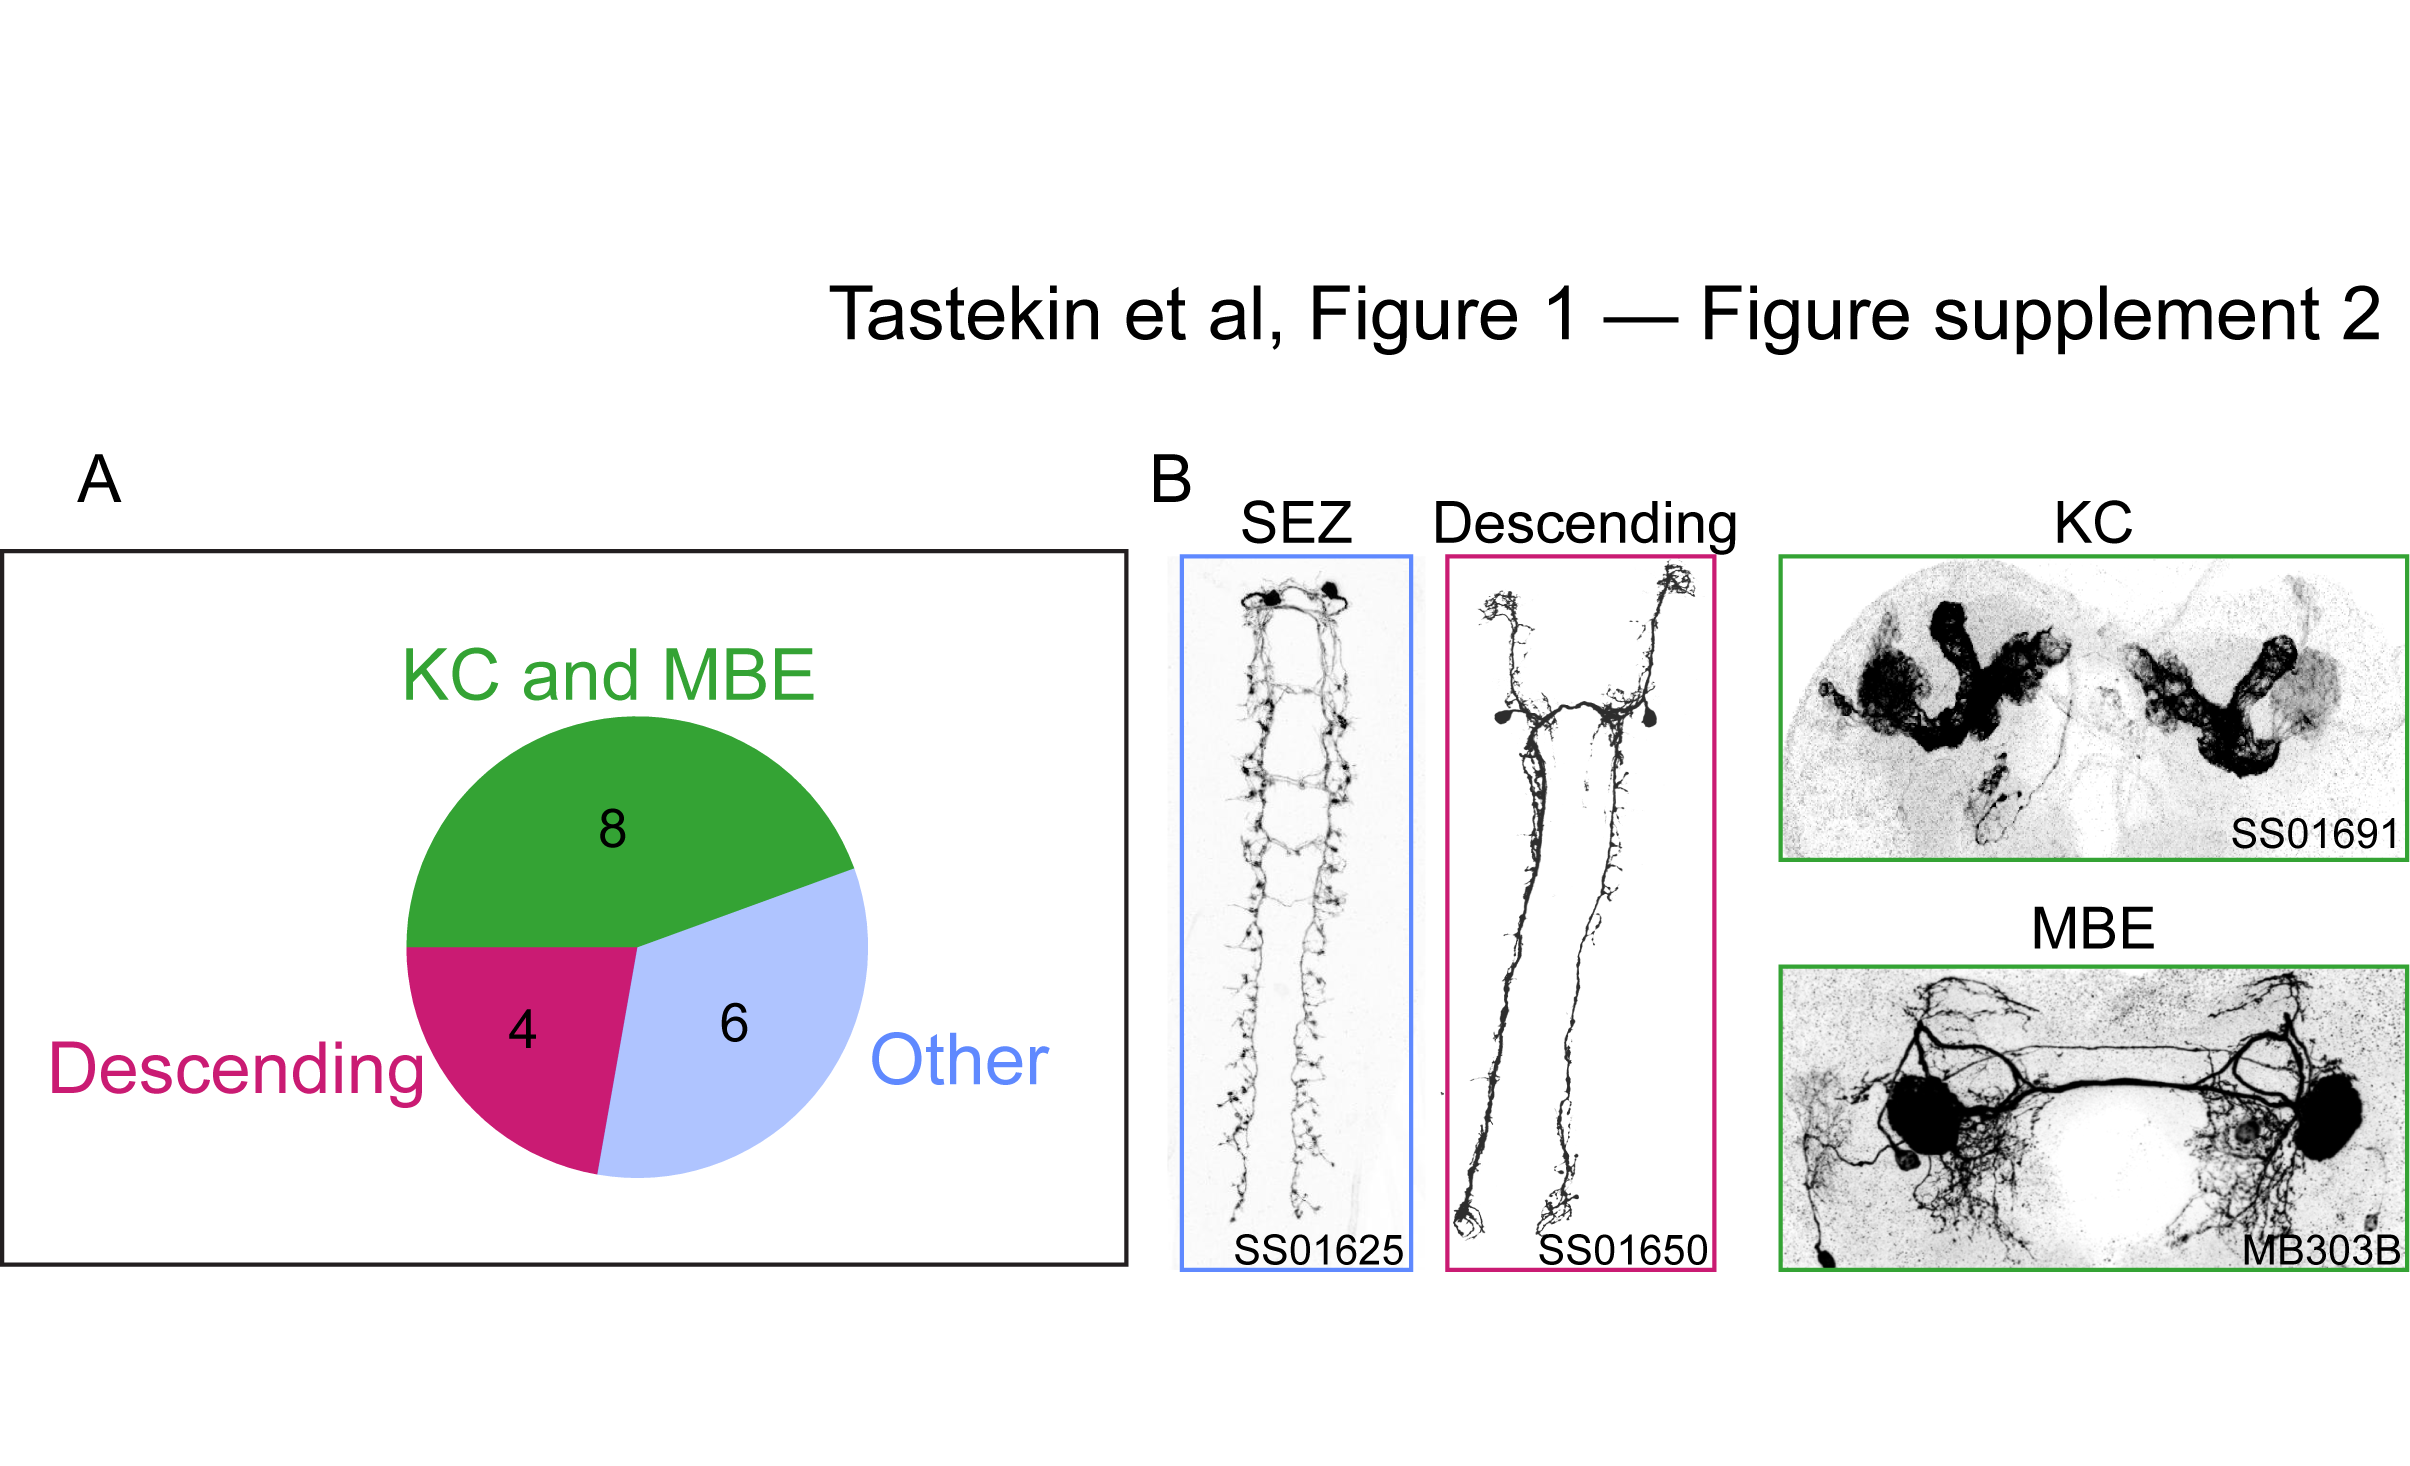

Supplement: supp [file elife-38740-supp-v1.zip › elife_poa_e38740_Figure_1_figure_supplement_2.tif]

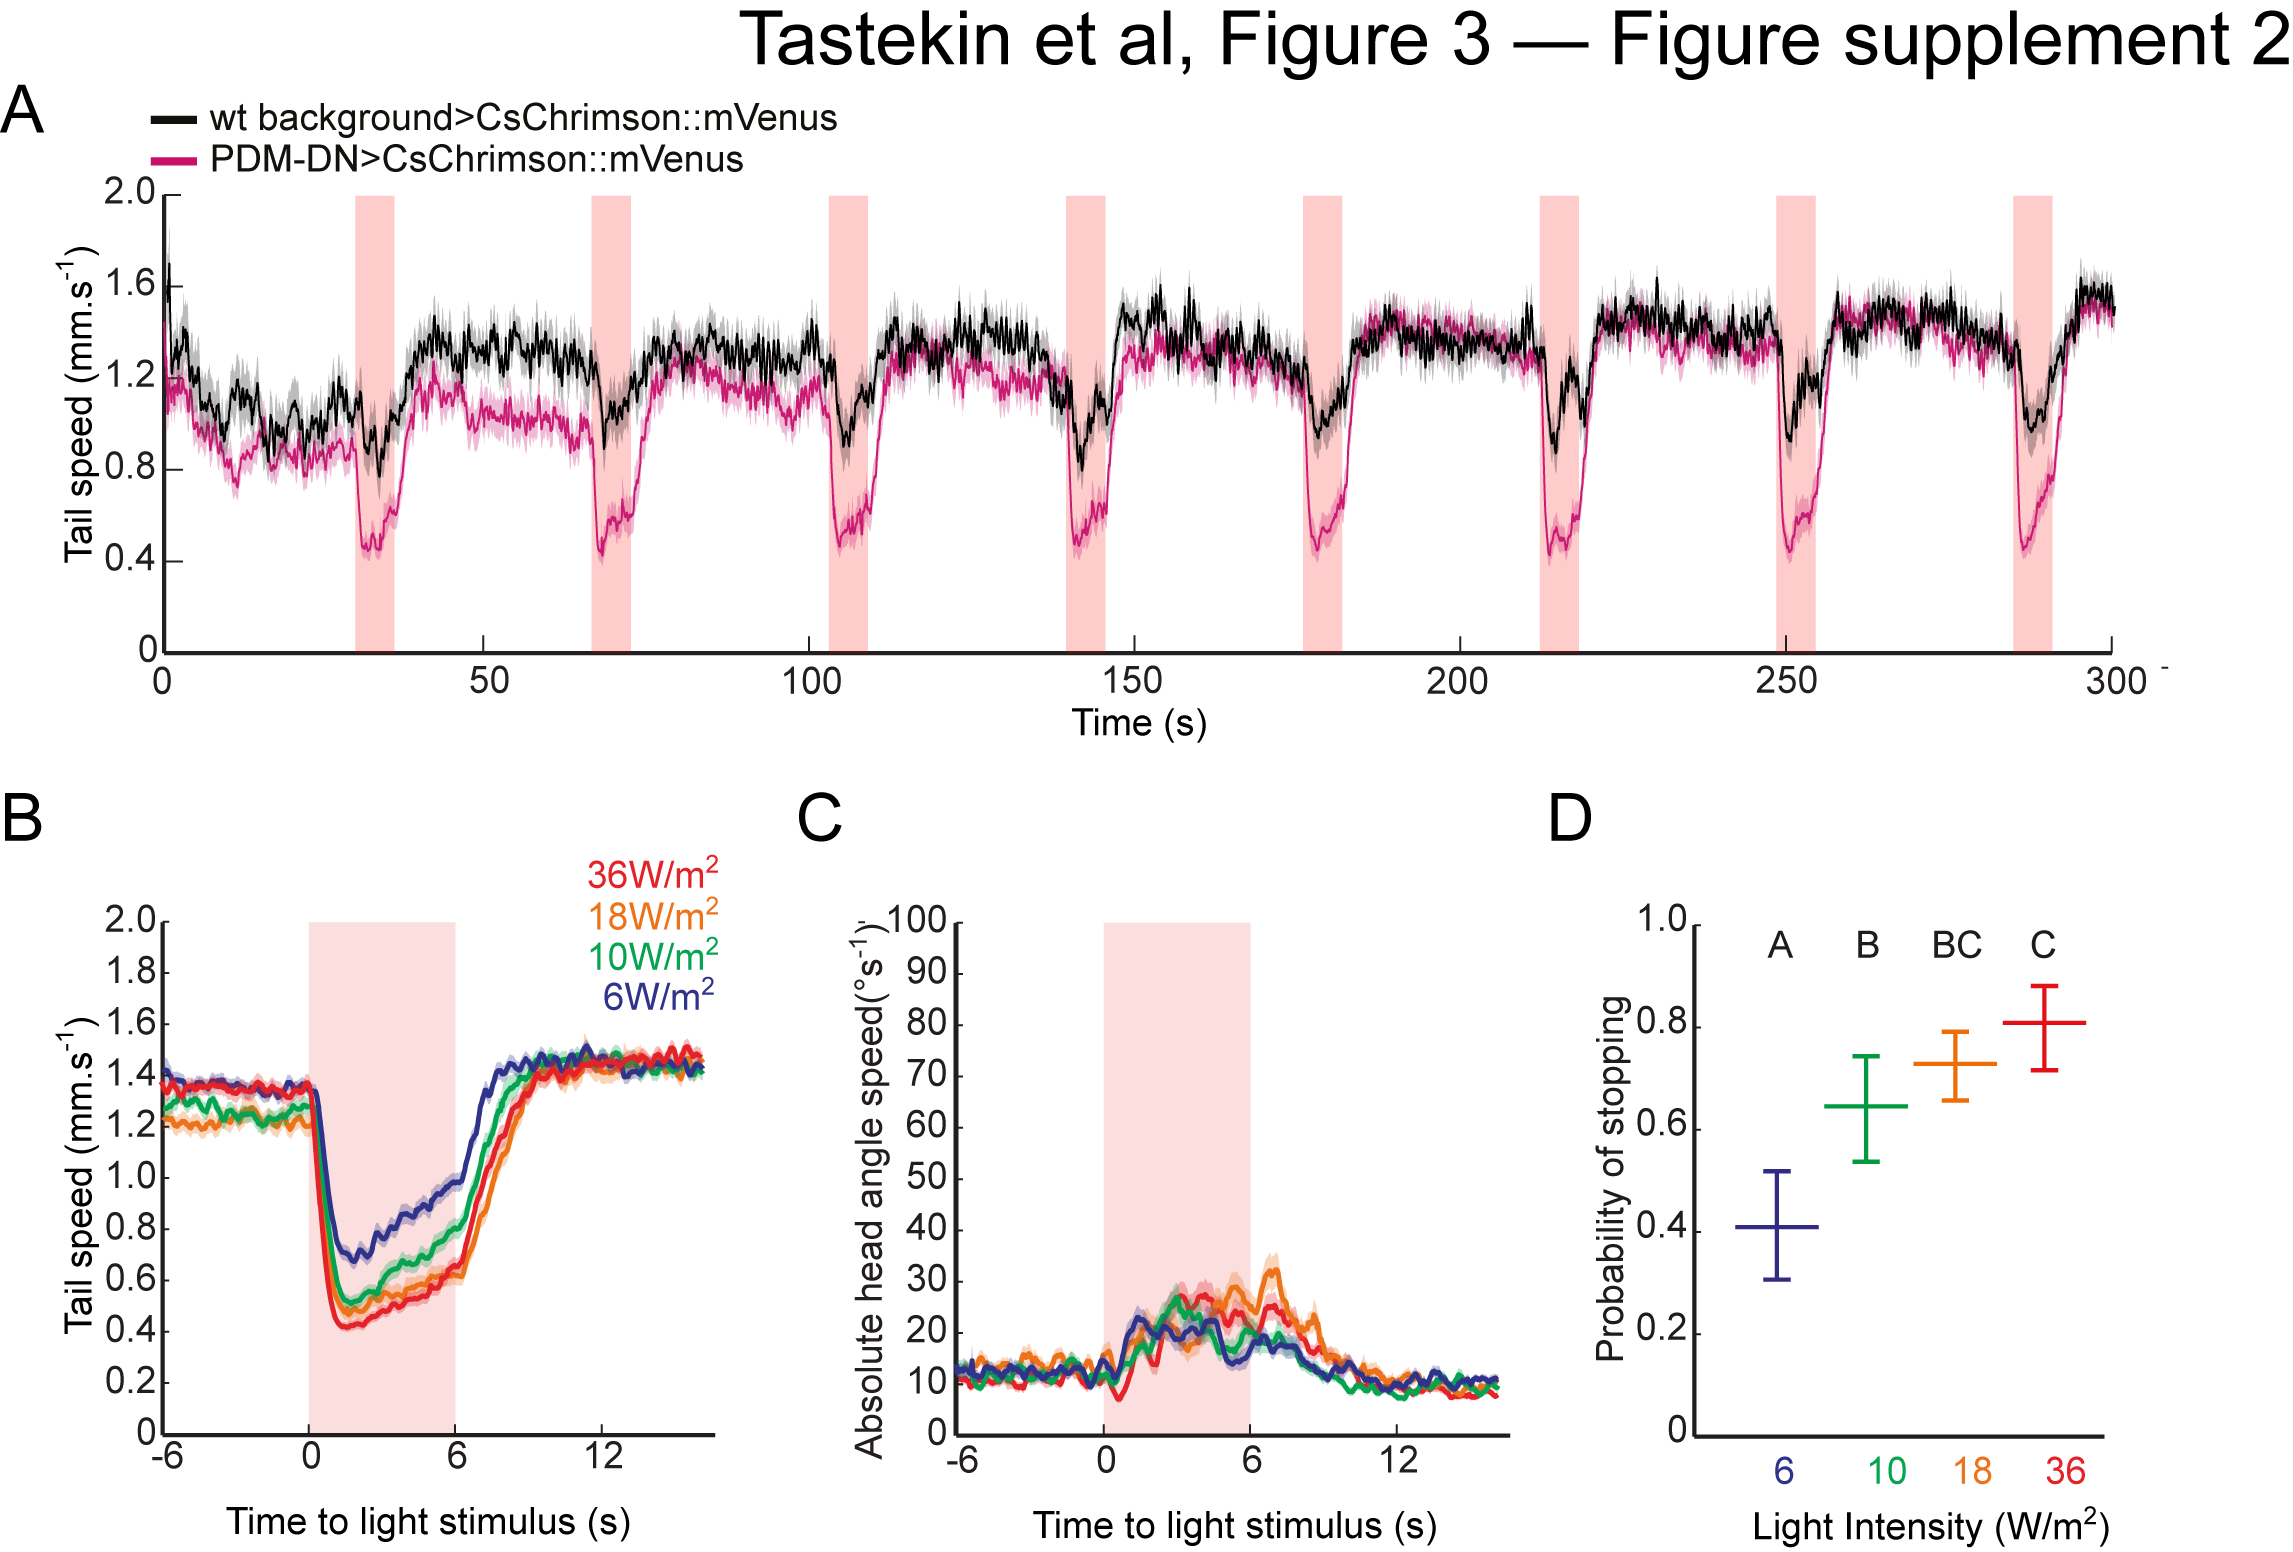

Supplement: supp [file elife-38740-supp-v1.zip › elife_poa_e38740_Figure_3_figure_supplement_2.tif]

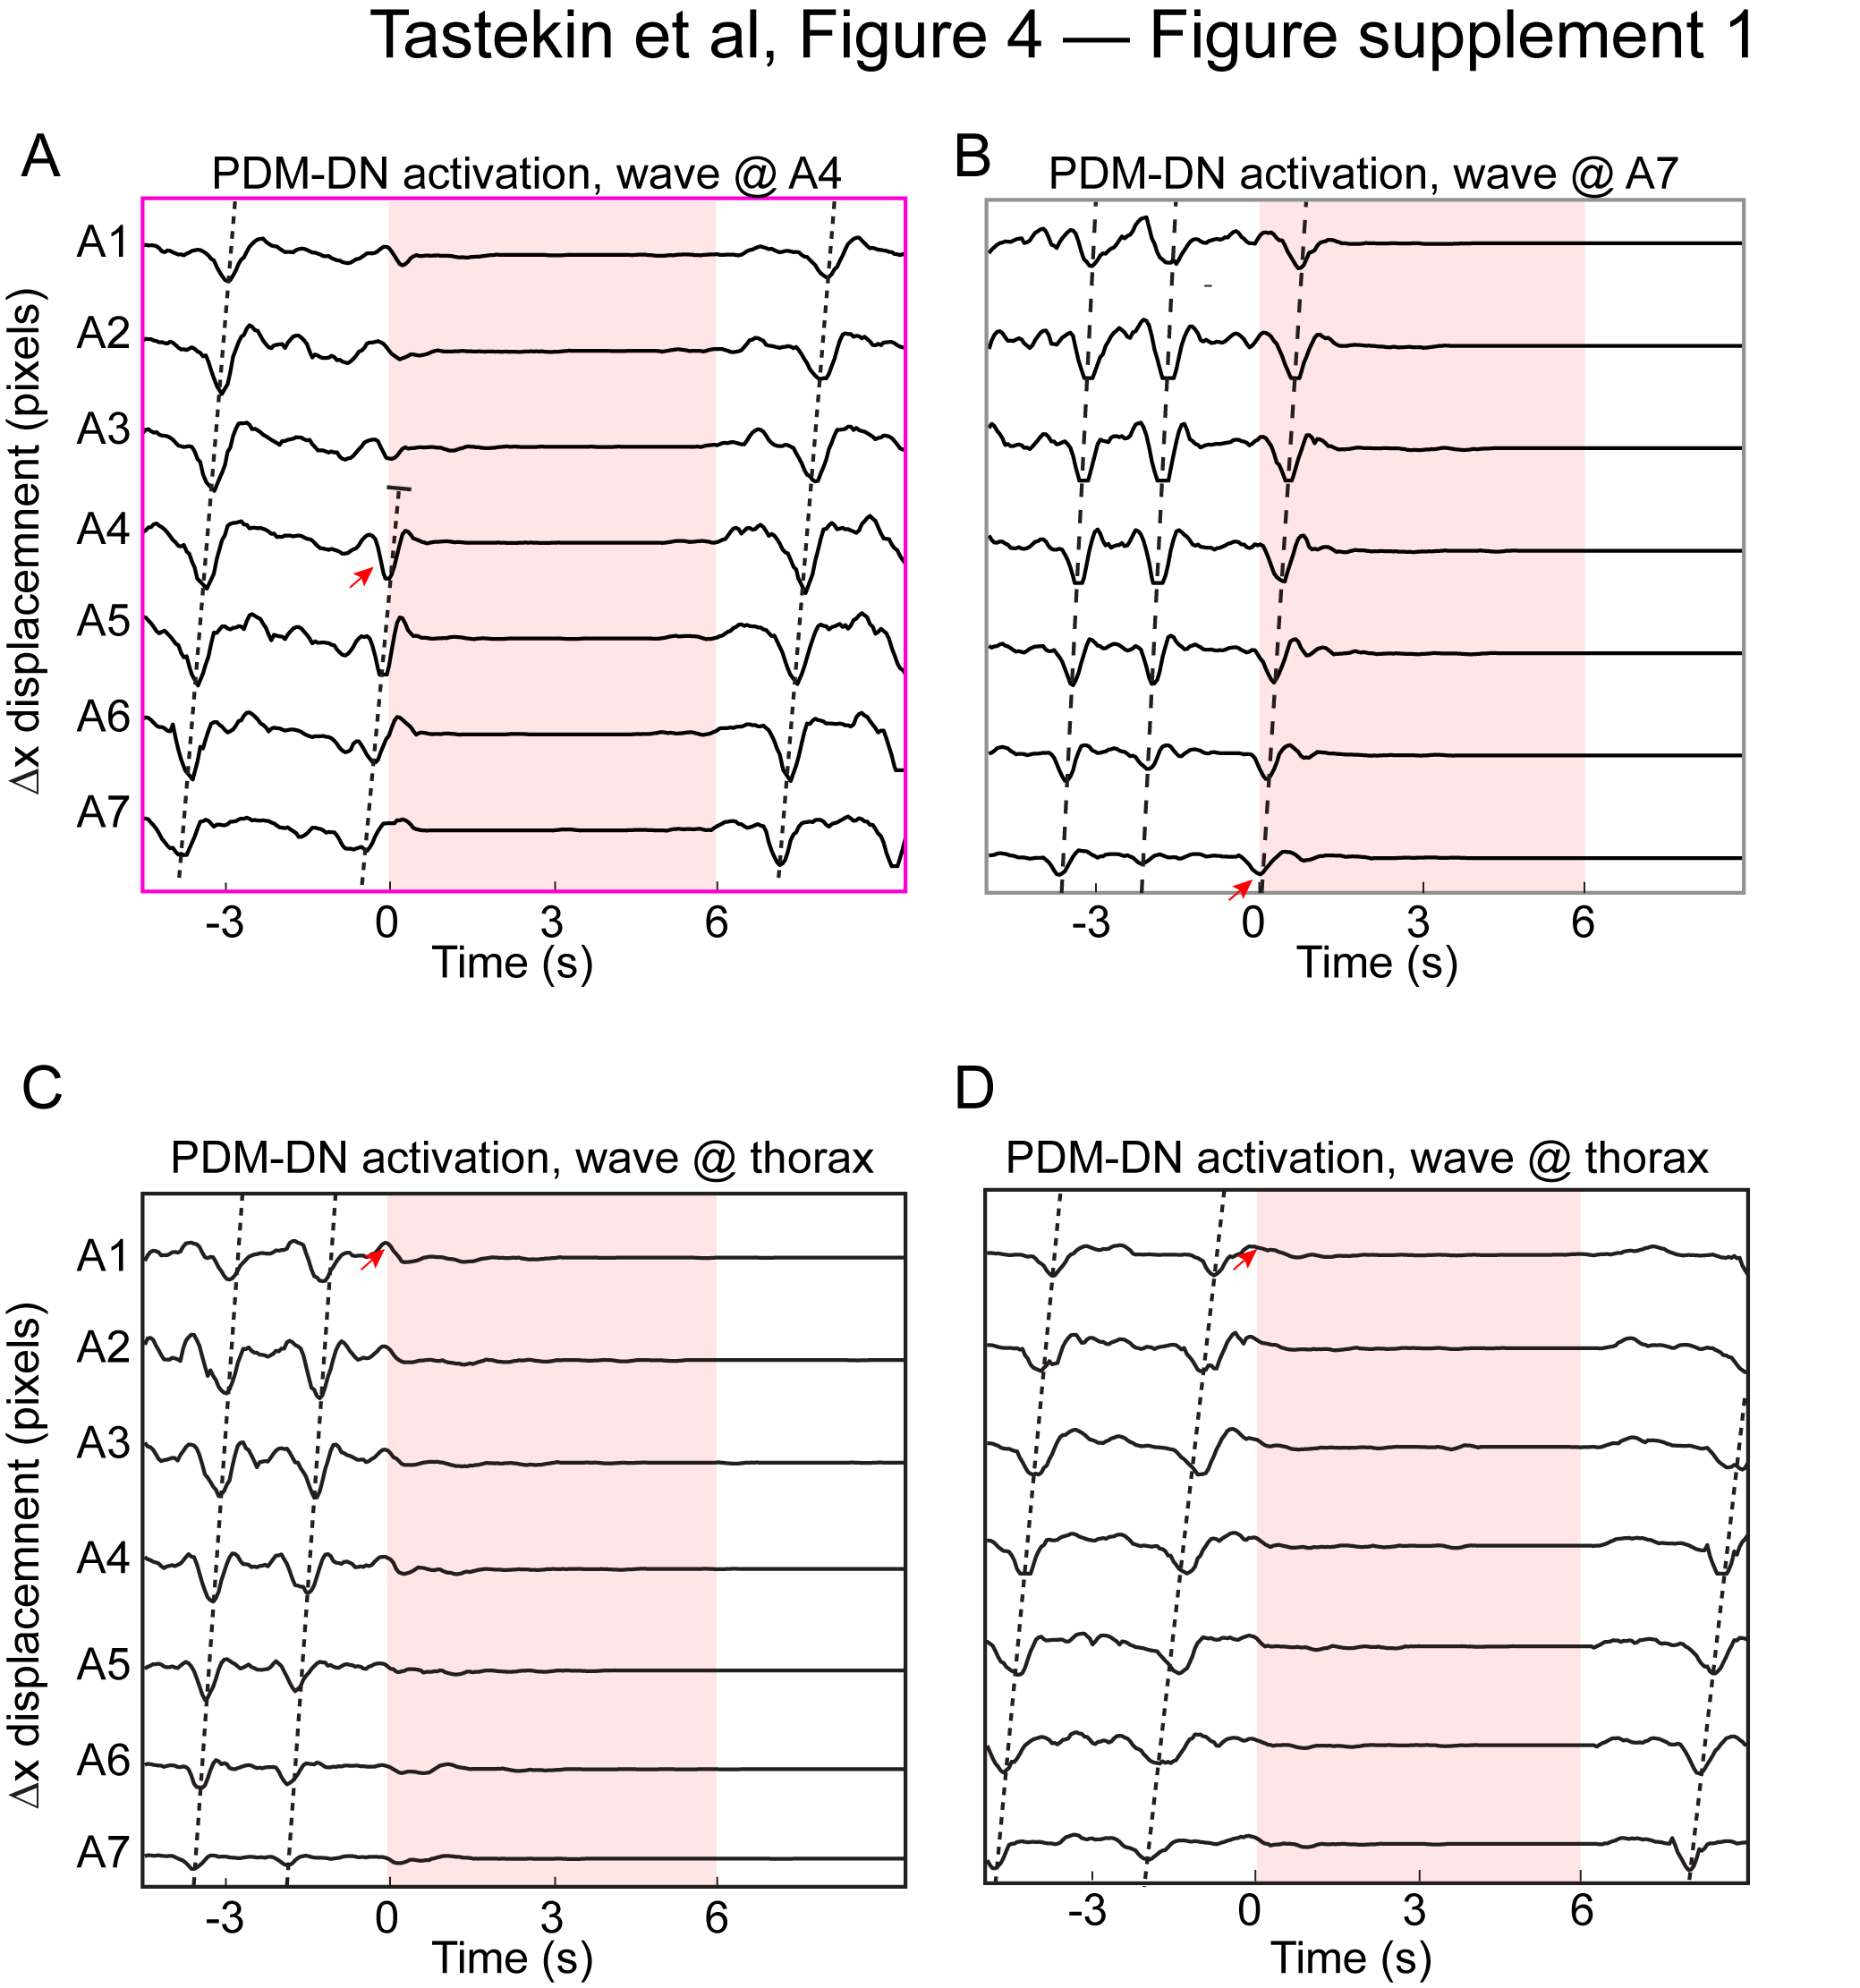

Supplement: supp [file elife-38740-supp-v1.zip › elife_poa_e38740_Figure_4_figure_supplement_1.tif]

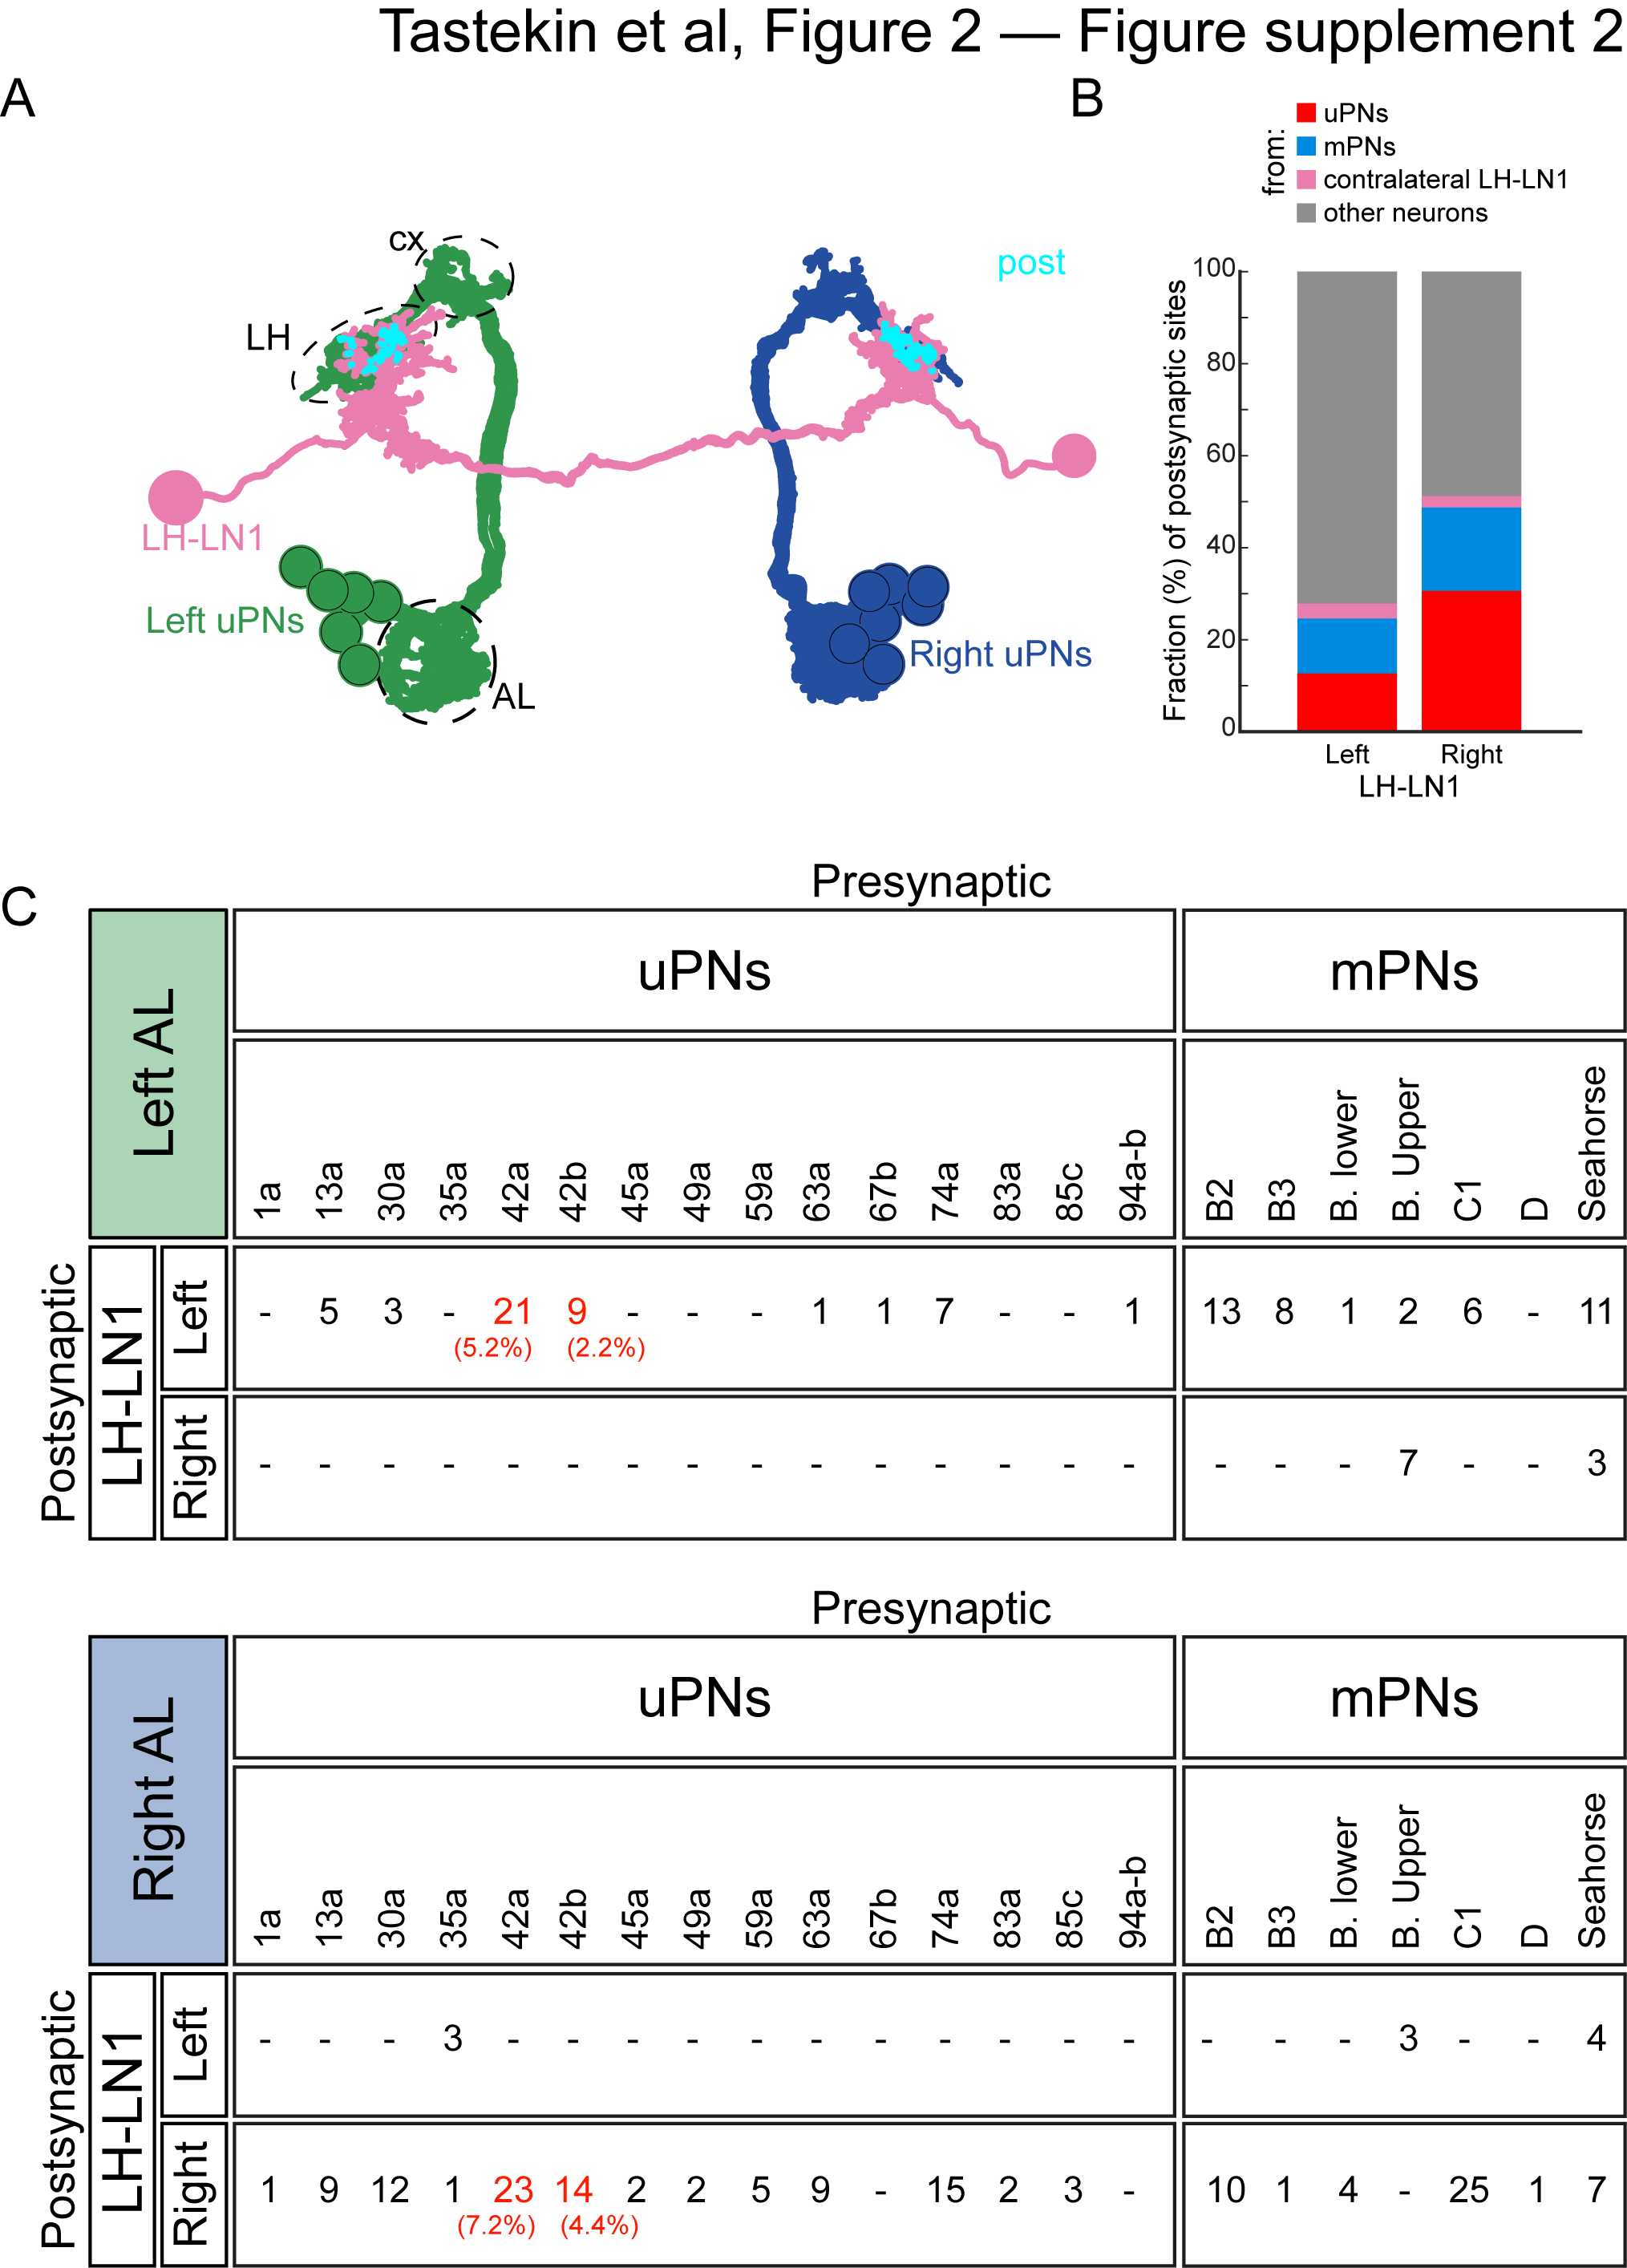

Supplement: supp [file elife-38740-supp-v1.zip › elife_poa_e38740_Figure_2_figure_supplement_2.tif]

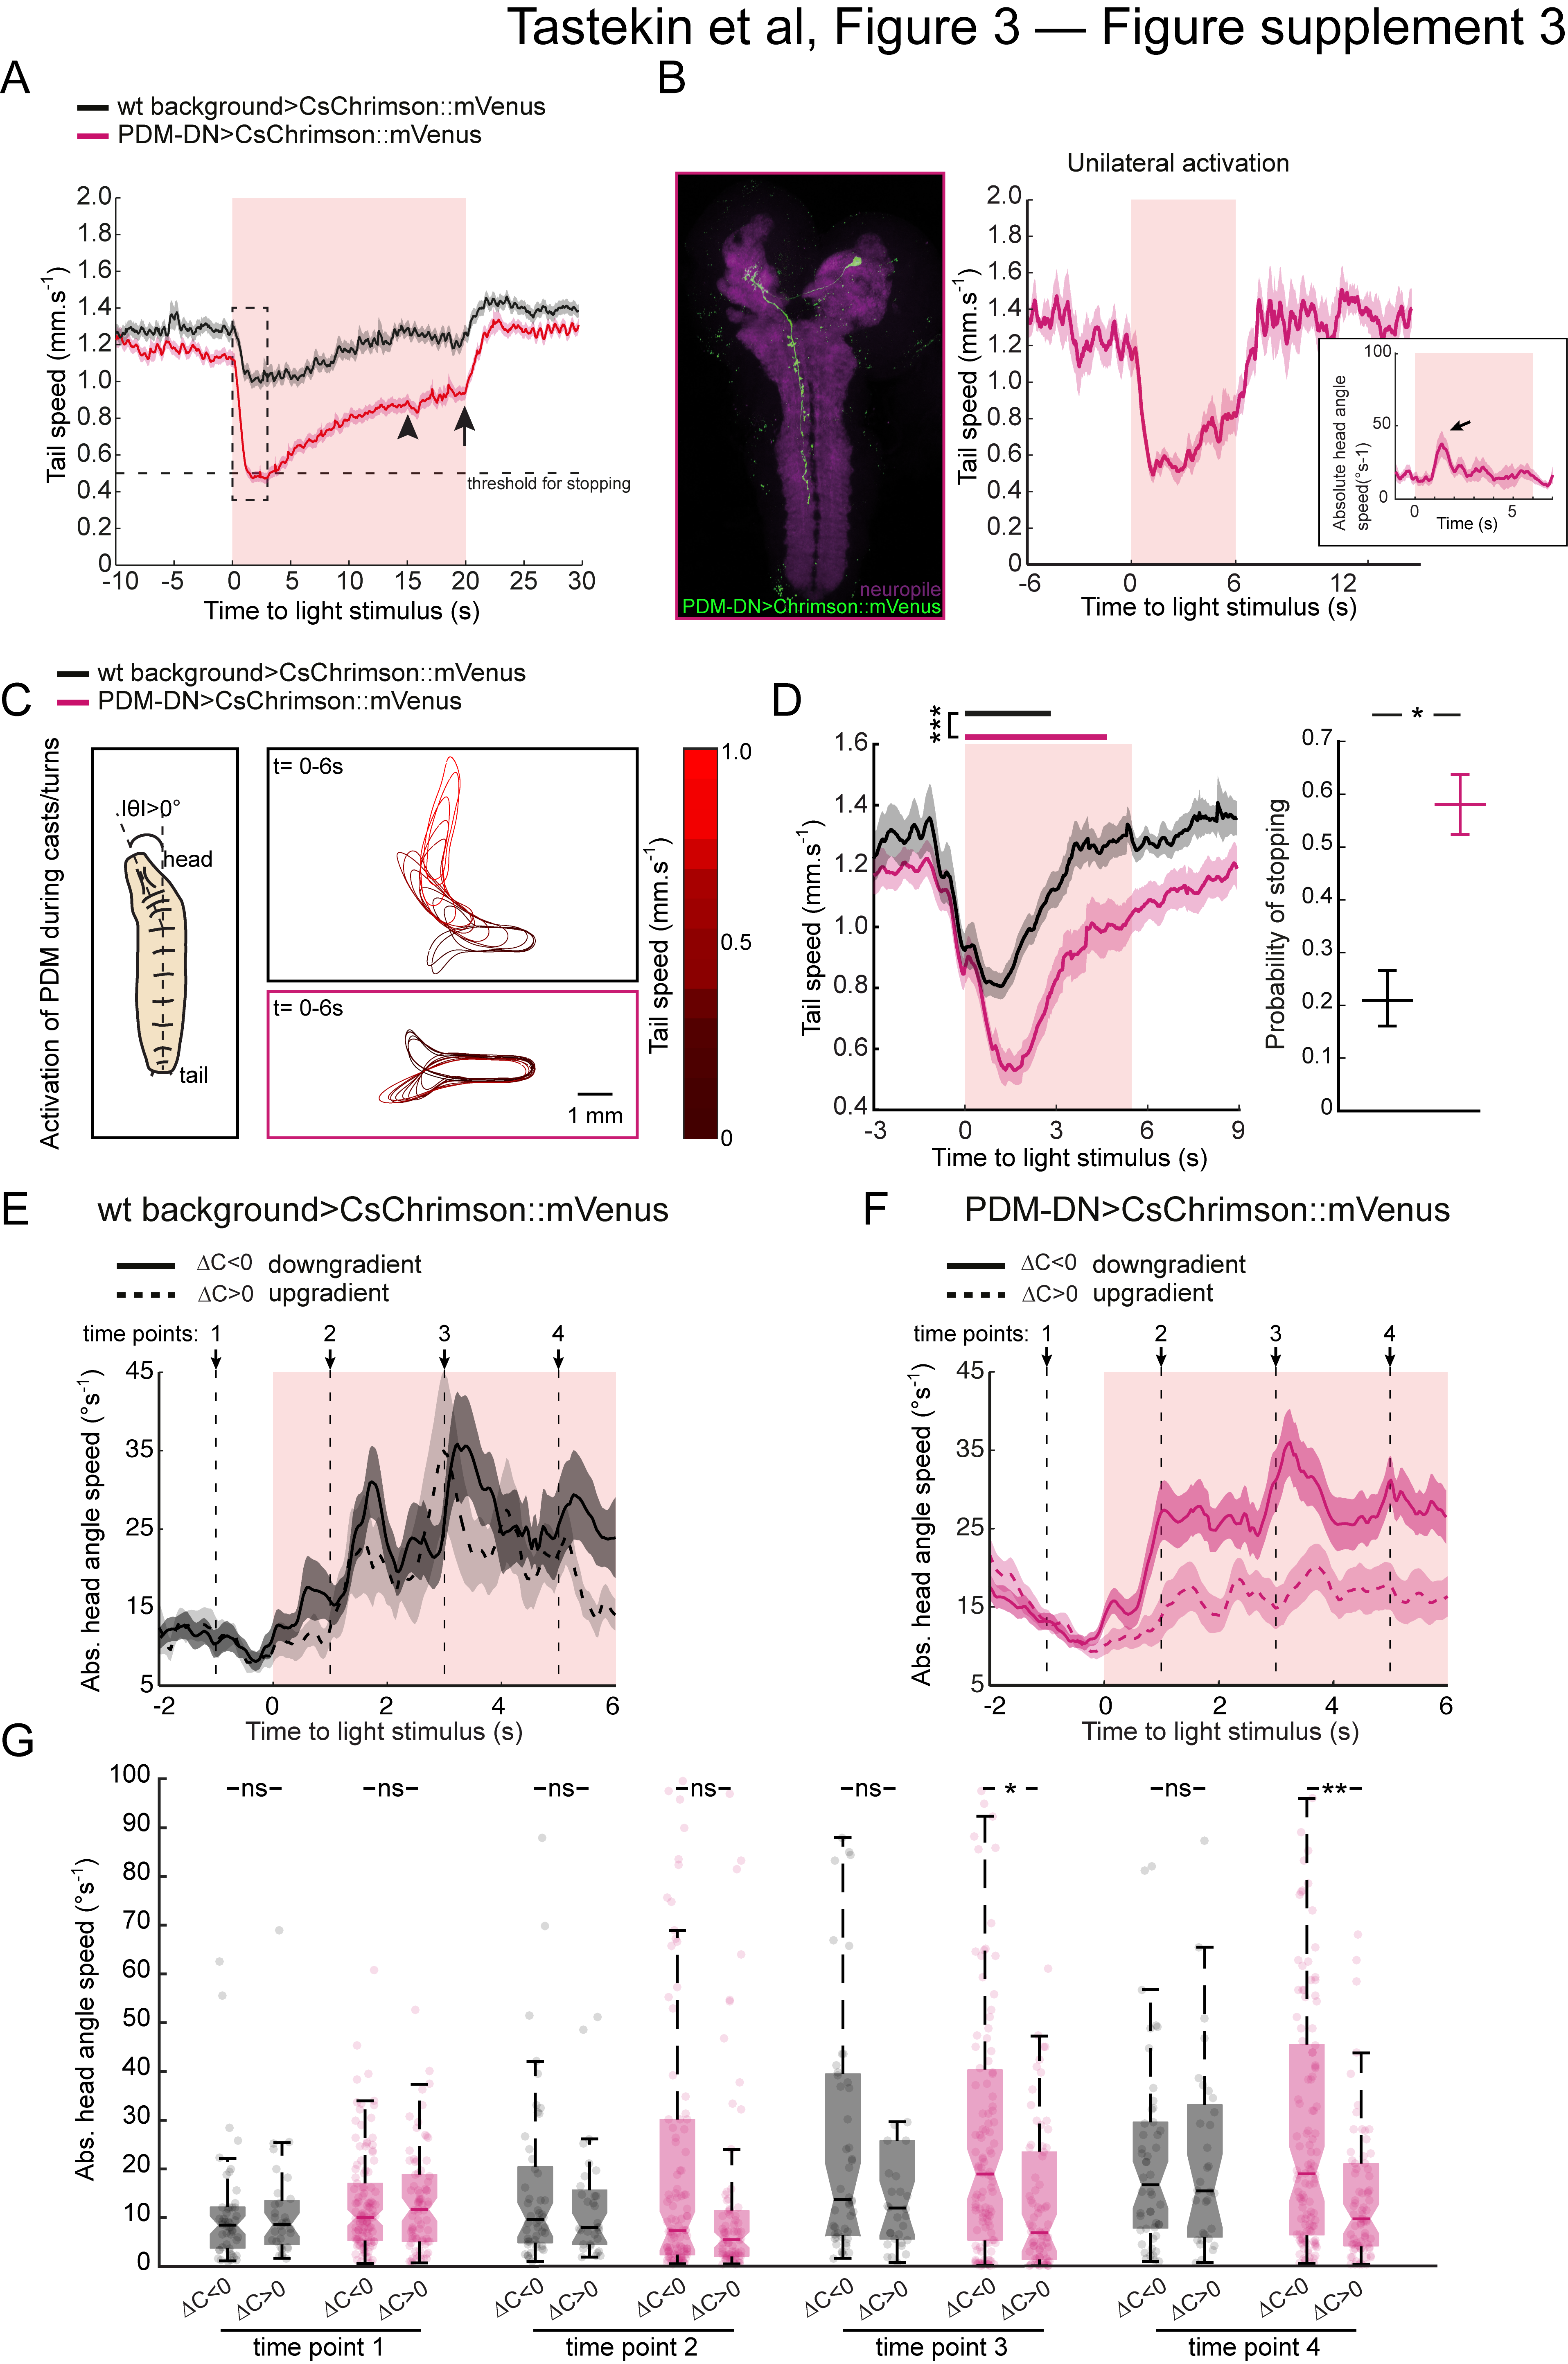

Supplement: supp [file elife-38740-supp-v1.zip › elife_poa_e38740_Figure_3_figure_supplement_3.tif]

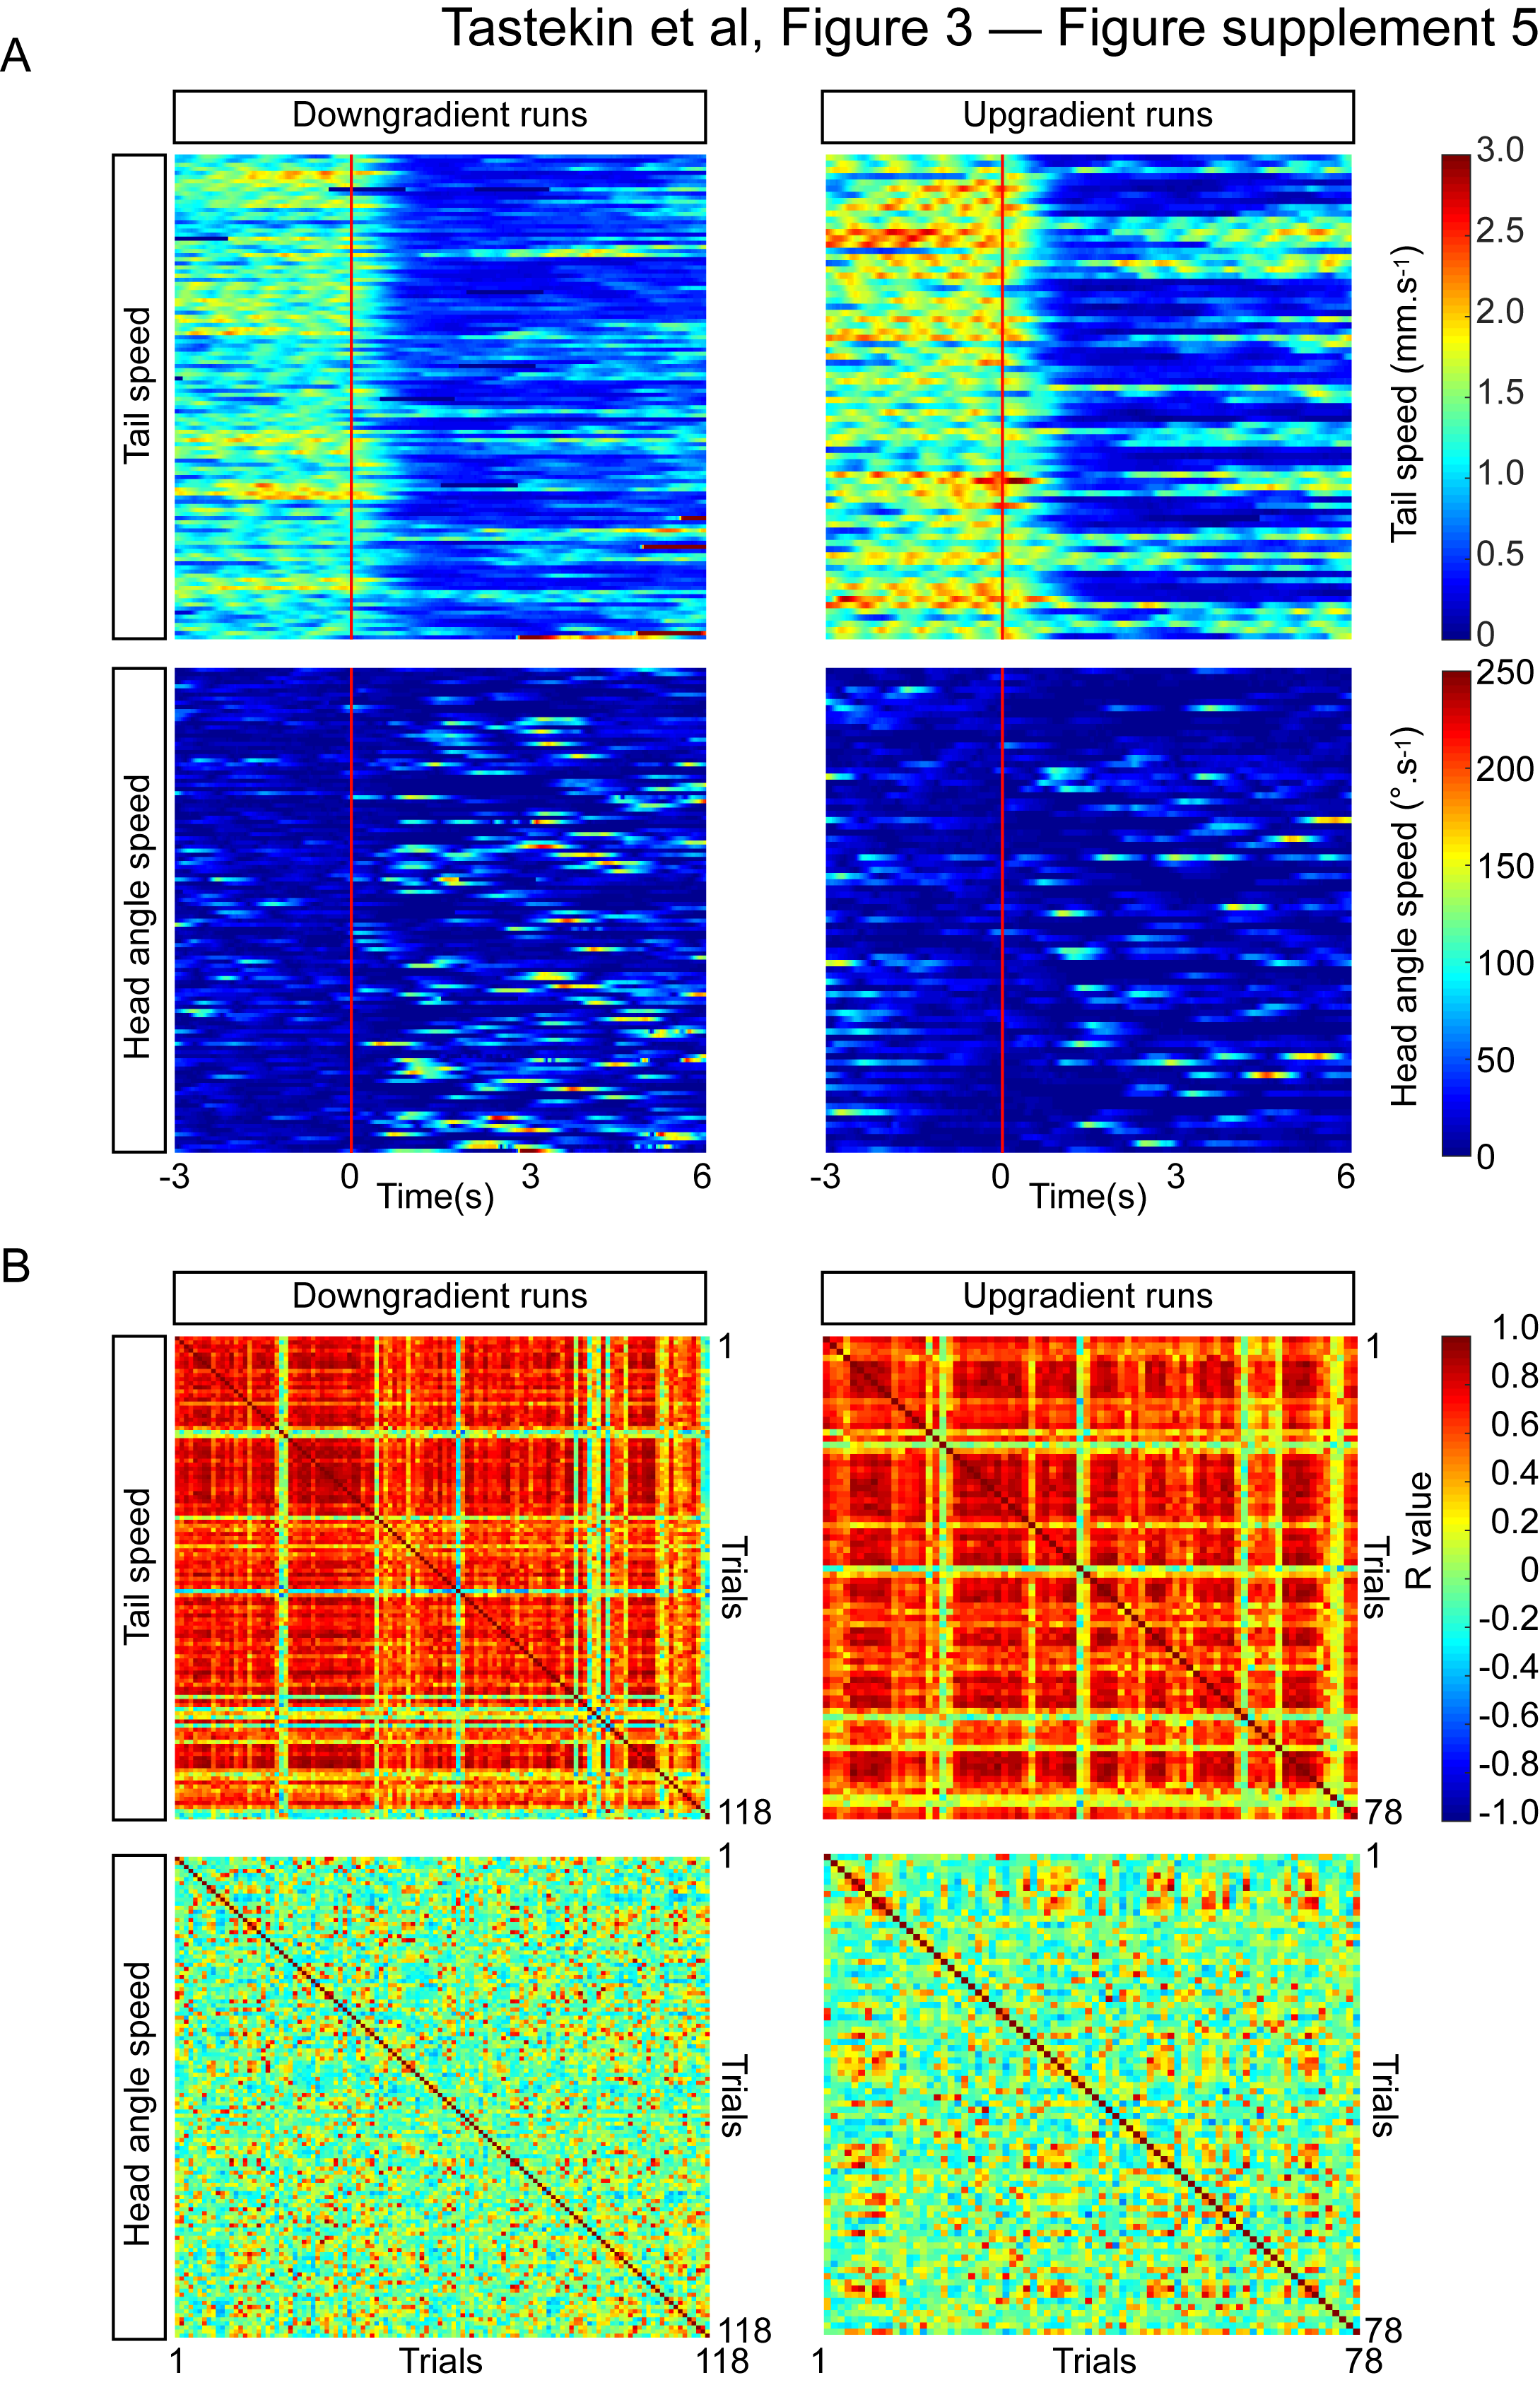

Supplement: supp [file elife-38740-supp-v1.zip › elife_poa_e38740_Figure_3_figure_supplement_5.tif]
